# Supplementary material for: Human microbiome derived synthetic antimicrobial peptides with activity against Gram-negative, Gram-positive, and antibiotic resistant bacteria
Source: Royal Society of Chemistry journal article supplement (doi:10.1039/d4md00383g), 2024-10-28
Supplement: d4md00383g1.xlsx [file d4md00383g1.xlsx]

## Sheet: Sheet1
Lactomodulin (LM)		MNKLNEVELSKISGGIGPLVIPVAAILGFLATDAWNHADELVAGVKQGWERS
Position	Sequence	AMP Probability	AMP Probability	AMP Probability	Class	Position	Sequence	AMP Probability	AMP Probability	AMP Probability	Class	Position	Sequence	AMP Probability	AMP Probability	AMP Probability	Class	Position	Sequence	AMP Probability	AMP Probability	AMP Probability	Class
		SVM	RF	DA	ANN			SVM	RF	DA	ANN			SVM	RF	DA	ANN			SVM	RF	DA	ANN
		1	1	1				1	1	1				1	1	1				1	1	1
		0	0	0				0	0	0				0	0	0				0	0	0
1-7	MNKLNEV	0.681	0.395	0.177	NAMP	1-10	MNKLNEVELS	0.229	0.362	0.003	NAMP	1-12	MNKLNEVELSKI	0.48	0.399	0.01	NAMP	1-15	MNKLNEVELSKISGG	0.31	0.179	0.002	NAMP
2-8	NKLNEVE	0.006	0.358	0.002	NAMP	2-11	NKLNEVELSK	0.439	0.321	0.01	NAMP	2-13	NKLNEVELSKIS	0.671	0.406	0.032	NAMP	2-16	NKLNEVELSKISGGI	0.819	0.188	0.143	NAMP
3-9	KLNEVEL	0.931	0.457	0.05	NAMP	3-12	KLNEVELSKI	0.741	0.328	0.059	AMP	3-14	KLNEVELSKISG	0.694	0.438	0.049	NAMP	3-17	KLNEVELSKISGGIG	0.858	0.233	0.357	AMP
4-10	LNEVELS	0.544	0.543	0.04	NAMP	4-13	LNEVELSKIS	0.118	0.347	0.017	NAMP	4-15	LNEVELSKISGG	0.375	0.444	0.066	NAMP	4-18	LNEVELSKISGGIGP	0.634	0.152	0.255	AMP
5-11	NEVELSK	0	0.443	0.015	NAMP	5-14	NEVELSKISG	0.258	0.372	0.002	NAMP	5-16	NEVELSKISGGI	0.589	0.468	0.051	NAMP	5-19	NEVELSKISGGIGPL	0.569	0.149	0.237	NAMP
6-12	EVELSKI	0.009	0.417	0.004	AMP	6-15	EVELSKISGG	0.242	0.352	0.009	NAMP	6-17	EVELSKISGGIG	0.518	0.435	0.088	AMP	6-20	EVELSKISGGIGPLV	0.573	0.165	0.3	AMP
7-13	VELSKIS	0.015	0.459	0.014	AMP	7-16	VELSKISGGI	0.479	0.42	0.189	AMP	7-18	VELSKISGGIGP	0.546	0.506	0.285	AMP	7-21	VELSKISGGIGPLVI	0.865	0.395	0.898	AMP
8-14	ELSKISG	0.249	0.419	0.004	AMP	8-17	ELSKISGGIG	0.345	0.327	0.065	AMP	8-19	ELSKISGGIGPL	0.39	0.414	0.275	AMP	8-22	ELSKISGGIGPLVIP	0.595	0.248	0.651	AMP
9-15	LSKISGG	0.681	0.438	0.212	AMP	9-18	LSKISGGIGP	0.791	0.454	0.692	AMP	9-20	LSKISGGIGPLV	0.891	0.615	0.928	AMP	9-23	LSKISGGIGPLVIPV	0.918	0.568	0.962	AMP
10-16	SKISGGI	0.01	0.27	0.022	NAMP	10-19	SKISGGIGPL	0.065	0.265	0.127	NAMP	10-21	SKISGGIGPLVI	0.136	0.37	0.59	NAMP	10-24	SKISGGIGPLVIPVA	0.321	0.385	0.794	NAMP
11-17	KISGGIG	0.028	0.285	0.157	AMP	11-20	KISGGIGPLV	0.31	0.334	0.683	AMP	11-22	KISGGIGPLVIP	0.612	0.593	0.859	AMP	11-25	KISGGIGPLVIPVAA	0.776	0.429	0.957	AMP
12-18	ISGGIGP	0.471	0.281	0.035	NAMP	12-21	ISGGIGPLVI	0.052	0.46	0.887	AMP	12-23	ISGGIGPLVIPV	0.4	0.63	0.88	AMP	12-26	ISGGIGPLVIPVAAI	0.864	0.478	0.957	AMP
13-19	SGGIGPL	0	0.268	0.055	AMP	13-22	SGGIGPLVIP	0.007	0.277	0.392	AMP	13-24	SGGIGPLVIPVA	0.052	0.43	0.598	AMP	13-27	SGGIGPLVIPVAAIL	0.312	0.43	0.926	AMP
14-20	GGIGPLV	0	0.342	0.455	AMP	14-23	GGIGPLVIPV	0.035	0.436	0.839	AMP	14-25	GGIGPLVIPVAA	0.258	0.521	0.939	AMP	14-28	GGIGPLVIPVAAILG	0.763	0.422	0.985	AMP
15-21	GIGPLVI	0	0.43	0.513	AMP	15-24	GIGPLVIPVA	0.178	0.451	0.83	AMP	15-26	GIGPLVIPVAAI	0.572	0.62	0.739	AMP	15-29	GIGPLVIPVAAILGF	0.81	0.443	0.943	AMP
16-22	IGPLVIP	0.025	0.478	0.69	AMP	16-25	IGPLVIPVAA	0.457	0.468	0.396	AMP	16-27	IGPLVIPVAAIL	0.745	0.711	0.144	AMP	16-30	IGPLVIPVAAILGFL	0.777	0.442	0.533	AMP
17-23	GPLVIPV	0.005	0.488	0.348	AMP	17-26	GPLVIPVAAI	0.179	0.457	0.396	AMP	17-28	GPLVIPVAAILG	0.478	0.581	0.827	AMP	17-31	GPLVIPVAAILGFLA	0.363	0.433	0.828	AMP
18-24	PLVIPVA	0.004	0.575	0.018	NAMP	18-27	PLVIPVAAIL	0.042	0.48	0.008	AMP	18-29	PLVIPVAAILGF	0.075	0.547	0.181	AMP	18-32	PLVIPVAAILGFLAT	0.204	0.352	0.352	AMP
19-25	LVIPVAA	0.026	0.473	0.002	AMP	19-28	LVIPVAAILG	0.368	0.469	0.021	AMP	19-30	LVIPVAAILGFL	0.183	0.638	0.029	AMP	19-33	LVIPVAAILGFLATD	0.29	0.555	0.469	NAMP
20-26	VIPVAAI	0.001	0.467	0.001	AMP	20-29	VIPVAAILGF	0.061	0.41	0.111	AMP	20-31	VIPVAAILGFLA	0.139	0.624	0.163	AMP	20-34	VIPVAAILGFLATDA	0.396	0.479	0.846	NAMP
21-27	IPVAAIL	0.008	0.479	0.008	AMP	21-30	IPVAAILGFL	0.048	0.419	0.284	AMP	21-32	IPVAAILGFLAT	0.227	0.525	0.791	AMP	21-35	IPVAAILGFLATDAW	0.445	0.308	0.81	NAMP
22-28	PVAAILG	0.001	0.358	0.219	AMP	22-31	PVAAILGFLA	0.003	0.408	0.445	AMP	22-33	PVAAILGFLATD	0.011	0.562	0.355	NAMP	22-36	PVAAILGFLATDAWN	0.13	0.276	0.365	NAMP
23-29	VAAILGF	0.001	0.375	0.008	AMP	23-32	VAAILGFLAT	0.002	0.408	0.411	AMP	23-34	VAAILGFLATDA	0.008	0.485	0.885	AMP	23-37	VAAILGFLATDAWNH	0.107	0.285	0.532	AMP
24-30	AAILGFL	0	0.411	0.052	AMP	24-33	AAILGFLATD	0	0.411	0.654	AMP	24-35	AAILGFLATDAW	0.006	0.443	0.617	AMP	24-38	AAILGFLATDAWNHA	0.089	0.252	0.433	AMP
25-31	AILGFLA	0	0.416	0.052	AMP	25-34	AILGFLATDA	0.004	0.388	0.654	AMP	25-36	AILGFLATDAWN	0.028	0.421	0.47	AMP	25-39	AILGFLATDAWNHAD	0.064	0.169	0.137	NAMP
26-32	ILGFLAT	0	0.425	0.47	AMP	26-35	ILGFLATDAW	0.01	0.305	0.305	AMP	26-37	ILGFLATDAWNH	0.045	0.362	0.131	AMP	26-40	ILGFLATDAWNHADE	0.063	0.077	0.044	NAMP
27-33	LGFLATD	0	0.455	0.054	NAMP	27-36	LGFLATDAWN	0.015	0.338	0.055	NAMP	27-38	LGFLATDAWNHA	0.043	0.316	0.037	NAMP	27-41	LGFLATDAWNHADEL	0.126	0.1	0.023	NAMP
28-34	GFLATDA	0.003	0.441	0.014	NAMP	28-37	GFLATDAWNH	0.011	0.255	0.01	NAMP	28-39	GFLATDAWNHAD	0.023	0.141	0.011	NAMP	28-42	GFLATDAWNHADELV	0.11	0.064	0.034	NAMP
29-35	FLATDAW	0.004	0.405	0.008	NAMP	29-38	FLATDAWNHA	0.021	0.257	0.009	NAMP	29-40	FLATDAWNHADE	0.026	0.088	0.004	NAMP	29-43	FLATDAWNHADELVA	0.126	0.091	0.039	NAMP
30-36	LATDAWN	0.012	0.386	0.003	NAMP	30-39	LATDAWNHAD	0.038	0.281	0.001	NAMP	30-41	LATDAWNHADEL	0.175	0.097	0.002	NAMP	30-44	LATDAWNHADELVAG	0.22	0.091	0.014	NAMP
31-37	ATDAWNH	0	0.393	0.001	NAMP	31-40	ATDAWNHADE	0	0.258	0.001	NAMP	31-42	ATDAWNHADELV	0.015	0.089	0.001	NAMP	31-45	ATDAWNHADELVAGV	0.069	0.06	0.01	NAMP
32-38	TDAWNHA	0.002	0.346	0.001	NAMP	32-41	TDAWNHADEL	0.014	0.224	0	NAMP	32-43	TDAWNHADELVA	0.029	0.086	0	NAMP	32-46	TDAWNHADELVAGVK	0.071	0.022	0.003	NAMP
33-39	DAWNHAD	0.001	0.345	0.007	NAMP	33-42	DAWNHADELV	0.066	0.201	0.002	NAMP	33-44	DAWNHADELVAG	0.059	0.119	0.008	NAMP	33-47	DAWNHADELVAGVKQ	0.18	0.043	0.071	NAMP
34-40	AWNHADE	0.001	0.311	0.007	NAMP	34-43	AWNHADELVA	0.03	0.188	0.003	NAMP	34-45	AWNHADELVAGV	0.086	0.256	0.033	NAMP	34-48	AWNHADELVAGVKQG	0.368	0.132	0.17	NAMP
35-41	WNHADEL	0.07	0.261	0.005	NAMP	35-44	WNHADELVAG	0.05	0.185	0.003	NAMP	35-46	WNHADELVAGVK	0.211	0.268	0.033	NAMP	35-49	WNHADELVAGVKQGW	0.274	0.135	0.324	NAMP
36-42	NHADELV	0.001	0.353	0.002	NAMP	36-45	NHADELVAGV	0.003	0.287	0.001	NAMP	36-47	NHADELVAGVKQ	0.05	0.16	0.009	NAMP	36-50	NHADELVAGVKQGWE	0.024	0.049	0.016	NAMP
37-43	HADELVA	0	0.329	0	NAMP	37-46	HADELVAGVK	0.011	0.322	0.001	NAMP	37-48	HADELVAGVKQG	0.08	0.312	0.005	NAMP	37-51	HADELVAGVKQGWER	0.029	0.047	0.001	NAMP
38-44	ADELVAG	0.115	0.383	0	NAMP	38-47	ADELVAGVKQ	0.057	0.36	0.002	NAMP	38-49	ADELVAGVKQGW	0.392	0.38	0.037	NAMP	38-52	ADELVAGVKQGWERS	0.038	0.274	0.007	AMP
39-45	DELVAGV	0.733	0.437	0	NAMP	39-48	DELVAGVKQG	0.004	0.327	0.001	NAMP	39-50	DELVAGVKQGWE	0.001	0.34	0.001	NAMP
40-46	ELVAGVK	0	0.399	0.002	AMP	40-49	ELVAGVKQGW	0.145	0.246	0.026	AMP	40-51	ELVAGVKQGWER	0.013	0.332	0.001	NAMP
41-47	LVAGVKQ	0.02	0.424	0.129	AMP	41-50	LVAGVKQGWE	0.031	0.231	0.017	NAMP	41-52	LVAGVKQGWERS	0.035	0.274	0.042	AMP
42-48	VAGVKQG	0.05	0.379	0.019	AMP	42-51	VAGVKQGWER	0.033	0.197	0.002	NAMP
43-49	AGVKQGW	0.282	0.341	0.048	AMP	43-52	AGVKQGWERS	0.007	0.152	0.006	AMP
44-50	GVKQGWE	0.005	0.298	0.001	NAMP
45-51	VKQGWER	0.008	0.283	0	NAMP
46-52	KQGWERS	0	0.293	0.001	NAMP
