# Supplementary material for: Human microbiome derived synthetic antimicrobial peptides with activity against Gram-negative, Gram-positive, and antibiotic resistant bacteria
Source: Royal Society of Chemistry journal article supplement (doi:10.1039/d4md00383g), 2024-10-28
Supplement: d4md00383g2.pdf [file d4md00383g2.pdf]

## Human microbiome derived synthetic antimicrobial peptides with activity against Gram-negative, Gram-positive, and antibiotic resistant bacteria

Walaa Mousa,<sup>\*a,c,d†</sup> Ashif Shaikh,<sup>b†</sup> Rose Ghemrawi,<sup>a,c</sup> Mohammed Al-Dulaimi,<sup>b</sup> Aya Al Ali,<sup>a,c</sup> Nour Sammani,<sup>a,c</sup> Mostafa Khair,<sup>e</sup> Mohamed I. Helal,<sup>f</sup> Farah Almarzooq,<sup>g</sup> and Emilia Oueis<sup>\*b,h</sup>

E-mail: emilia.oueis@ku.ac.ae  
walaa.mousa@aau.ac.ae

---

<sup>a</sup> College of Pharmacy, Al Ain University, Abu Dhabi, PO BOX 64141, United Arab Emirates.

<sup>b</sup> Department of chemistry, Khalifa University of Science and Technology, Abu Dhabi, PO BOX 127788, United Arab Emirates.

<sup>c</sup> AAU Health and Biomedical Research Center, Al Ain University, Abu Dhabi, PO BOX 112612, United Arab Emirates.

<sup>d</sup> College of Pharmacy, Mansoura University, Mansoura 35516, Egypt.

<sup>e</sup> Core Technology Platforms, New York University Abu Dhabi, PO BOX 127788, United Arab Emirates.

<sup>f</sup> Electron Microscopy Core Labs, Khalifa University of Science and Technology, Abu Dhabi, PO BOX 127788, United Arab Emirates.

<sup>g</sup> Department of Medical Microbiology and Immunology, College of Medicine and Health Sciences, UAE University, Al Ain P.O. Box 15551, United Arab Emirates.

<sup>h</sup> Healthcare engineering innovation group, Khalifa University of Science and Technology, Abu Dhabi, PO BOX 127788, United Arab Emirates.

† These authors contributed equally to this work.

### Table of Contents

|                                                                                  |     |
|----------------------------------------------------------------------------------|-----|
| Predicted secondary structure and data of peptides .....                         | S2  |
| Marfey's Analysis of cyclic peptides .....                                       | S4  |
| Structures, LC chromatograms, and HRMS spectra of the synthesized peptides ..... | S5  |
| MS/MS fragmentation data of LM6 and its cyclic derivatives LM13a and LM13b ..... | S19 |

## Predicted secondary structure and data of peptides

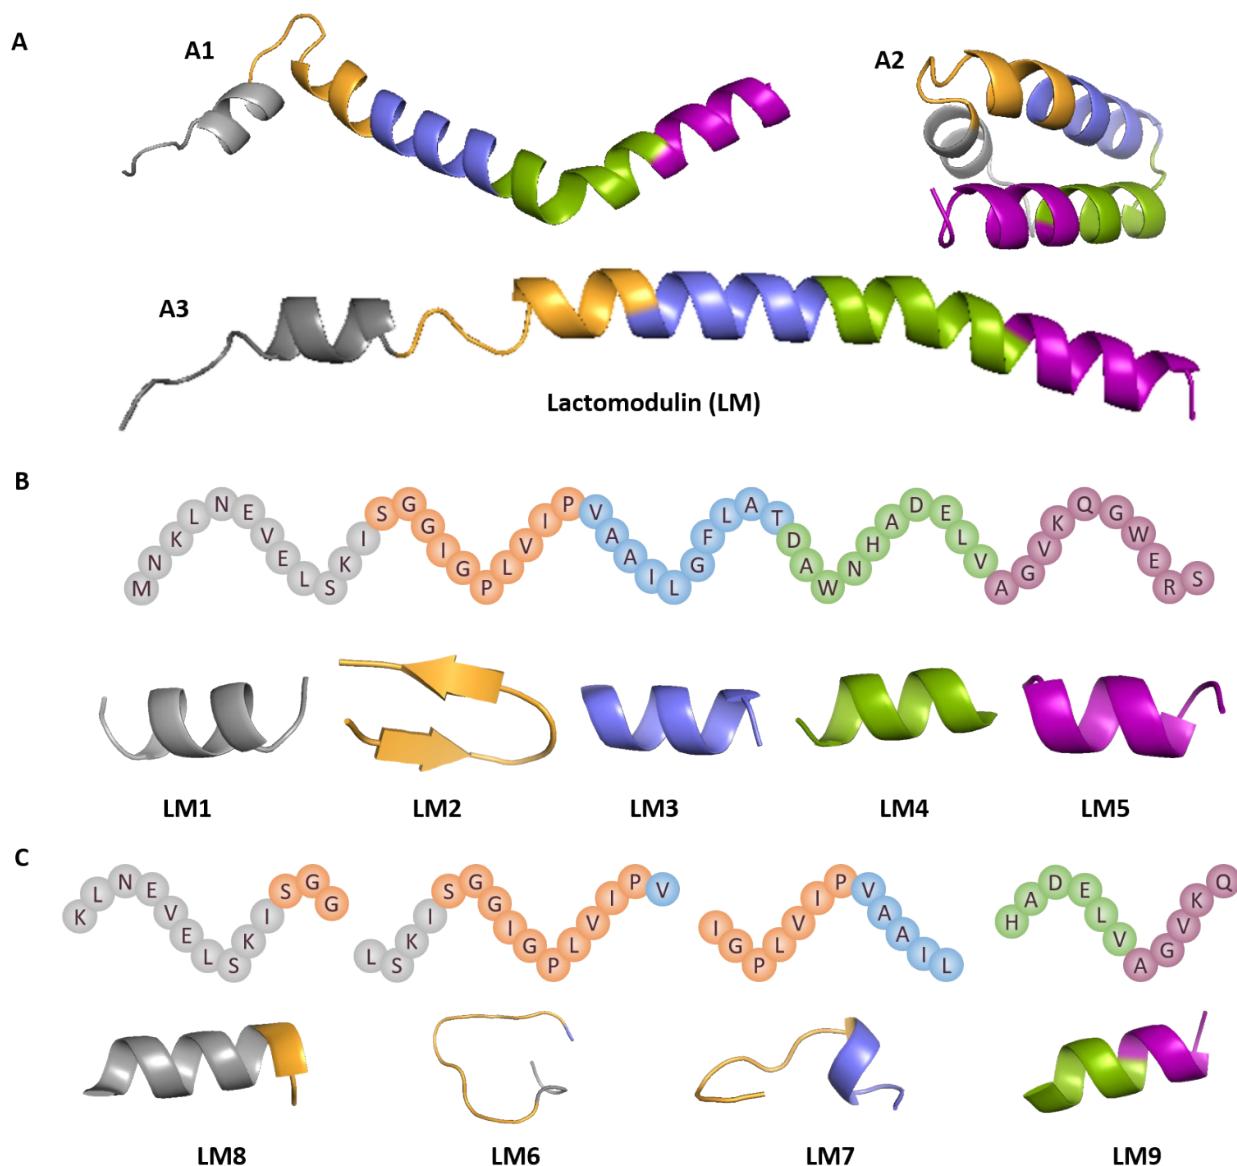

**Figure S1.** A) Helical structure of lactomodulin as predicted by RoseTTA (A1), Quark (A2), and AlphaFold (A3); B) Amino acid sequence of lactomodulin split into five color-coded peptides LM1-LM5 (grey, orange, blue, green, and purple, respectively) and their structural prediction by PEP-FOLD3; C) Sequence of peptides LM6-LM9 obtained based on AMP prediction using CAMPr3 and their structural prediction by PEP-FOLD3.

**Table S1. Novel Lactomodulin derivatives**

| No.   | Sequence                        | Molecular formula                                                  | MW (g/mol) | m/z calcd [M+H] <sup>+</sup> | m/z found [M+H] <sup>+</sup> | Δm (ppm) | Yield (%) | Purity (%) |
|-------|---------------------------------|--------------------------------------------------------------------|------------|------------------------------|------------------------------|----------|-----------|------------|
| LM1   | MNKLNEVELSKI-NH <sub>2</sub>    | C <sub>61</sub> H <sub>109</sub> N <sub>17</sub> O <sub>19</sub> S | 1416.78    | 1416.7879                    | 1416.7736                    | 10.0933  | 15.1      | 76         |
| LM2   | SGGIGPLVIP-NH <sub>2</sub>      | C <sub>42</sub> H <sub>73</sub> N <sub>11</sub> O <sub>11</sub>    | 908.18     | 908.5564                     | 908.5530                     | 3.7422   | 24.0      | 99         |
| LM3   | VAAILGFLAT-NH <sub>2</sub>      | C <sub>47</sub> H <sub>79</sub> N <sub>11</sub> O <sub>11</sub>    | 974.27     | 974.6033                     | 974.6000                     | 3.3860   | 29.3      | 96         |
| LM4   | DAWNHADELV-NH <sub>2</sub>      | C <sub>51</sub> H <sub>73</sub> N <sub>15</sub> O <sub>17</sub>    | 1168.28    | 1168.5382                    | 1168.5320                    | 5.3058   | 19.7      | 97         |
| LM5   | AGVKQGWERS-NH <sub>2</sub>      | C <sub>48</sub> H <sub>77</sub> N <sub>17</sub> O <sub>14</sub>    | 1116.23    | 1116.5909                    | 1116.5795                    | 10.2096  | 19.4      | 99         |
|       |                                 |                                                                    |            |                              |                              |          |           |            |
| LM6   | LSKISGGIGPLVIPV-NH <sub>2</sub> | C <sub>68</sub> H <sub>121</sub> N <sub>17</sub> O <sub>17</sub>   | 1448.92    | 1448.9199                    | 1448.9039                    | 11.0427  | 10.8      | 98         |
| LM7   | IGPLVIPVAAIL-NH <sub>2</sub>    | C <sub>58</sub> H <sub>103</sub> N <sub>13</sub> O <sub>12</sub>   | 1174.62    | 1174.7922                    | 1174.7838                    | 7.1502   | 19.5      | 97         |
| LM8   | KLNEVELSKISGG-NH <sub>2</sub>   | C <sub>59</sub> H <sub>105</sub> N <sub>17</sub> O <sub>20</sub>   | 1372.67    | 1372.7774                    | 1372.7755                    | 1.3841   | 12.5      | 98         |
| LM9   | HADELVAGVKQ-NH <sub>2</sub>     | C <sub>50</sub> H <sub>84</sub> N <sub>16</sub> O <sub>16</sub>    | 1165.38    | 1165.6324                    | 1165.6274                    | 4.2895   | 14.4      | 95         |
|       |                                 |                                                                    |            |                              |                              |          |           |            |
| LM10  | LSKISGGIGP-NH <sub>2</sub>      | C <sub>41</sub> H <sub>74</sub> N <sub>12</sub> O <sub>12</sub>    | 927.18     | 927.5622                     | 927.5567                     | 5.9295   | 31.6      | 96         |
| LM11  | KISGGIGPLV-NH <sub>2</sub>      | C <sub>43</sub> H <sub>78</sub> N <sub>12</sub> O <sub>11</sub>    | 939.24     | 939.5986                     | 939.5935                     | 5.4278   | 23.5      | 97         |
| LM12  | LSKISG-NH <sub>2</sub>          | C <sub>26</sub> H <sub>50</sub> N <sub>8</sub> O <sub>8</sub>      | 602.77     | 603.3824                     | 603.3814                     | 1.6573   | 38.3      | 95         |
|       |                                 |                                                                    |            |                              |                              |          |           |            |
| LM13a | Cyc(LSKISGGIGPLVIPv)            | C <sub>68</sub> H <sub>118</sub> N <sub>16</sub> O <sub>17</sub>   | 1431.79    | 1431.8934                    | 1431.8863                    | 4.9585   | 6.1       | 95         |
| LM13b | Cyc(LSKISGGIGPLVIPV)            | C <sub>68</sub> H <sub>118</sub> N <sub>16</sub> O <sub>17</sub>   | 1431.79    | 1431.8934                    | 1431.8873                    | 4.2601   | 1.0       | 95         |
|       |                                 |                                                                    |            |                              |                              |          |           |            |

## Marfey's Analysis of cyclic peptides

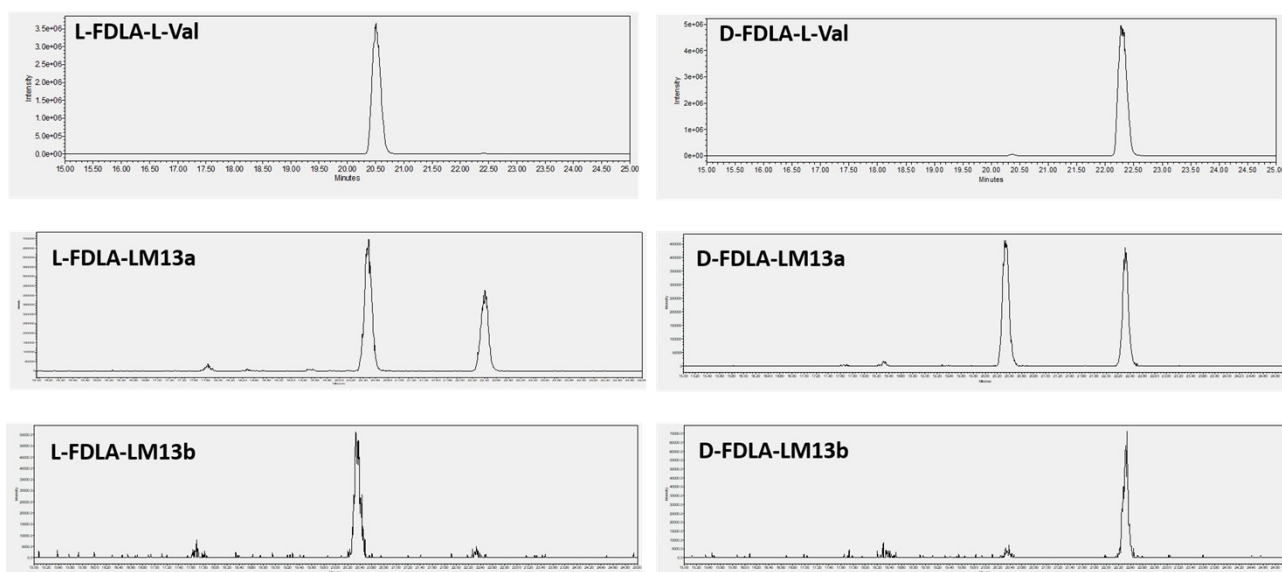

**Figure S2.** Extracted ion chromatogram of Marfey's derivatives (L-/D-FDLA) of L-Val, LM13a and LM13b at 368 Da in negative ion mode.

**Table S2:** Marfey's analysis of Valine amino acid in LM13a and LM13b

|       | L-FDLA derivative $t_R$ (min) | D-FDLA derivative $t_R$ (min) |
|-------|-------------------------------|-------------------------------|
| L-Val | 20.5                          | 22.5                          |
| LM13a | 20.5                          | 20.5                          |
|       | 22.5                          | 22.5                          |
| LM13b | 20.5                          | 22.5                          |

LM13 contains two valine residues. The Marfey's analysis show that the major compound LM13a has both l- and d-Valine residues within its structure, whereas the minor compound LM13b has only l-Valine within its structure. The d-Valine in LM13a is the result of the epimerization of the valine residue at the point of macrocyclization.

## Structures, LC chromatograms, and HRMS spectra of the synthesized peptides

### A) LM1

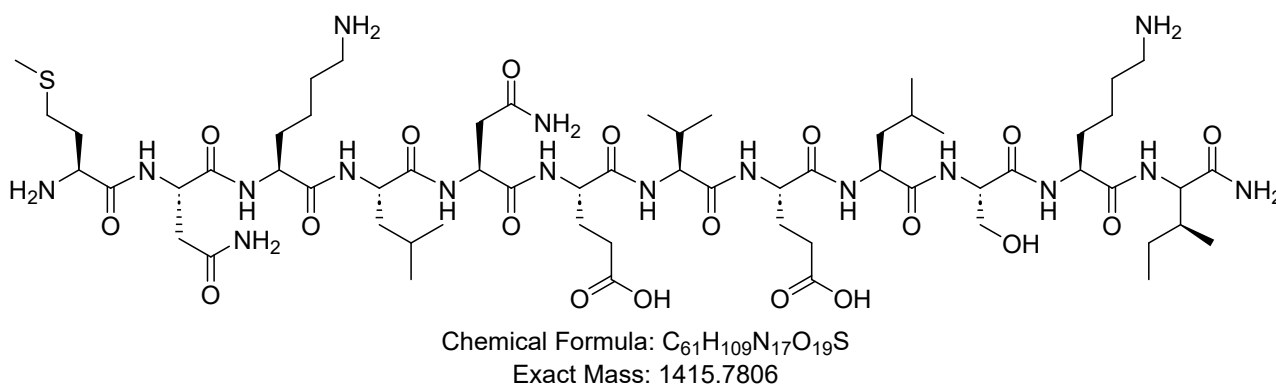

C:\Xcalibur...W1\_Peak2\_PHPLC

09/12/23 17:43:02

RT: 4.00 - 25.00

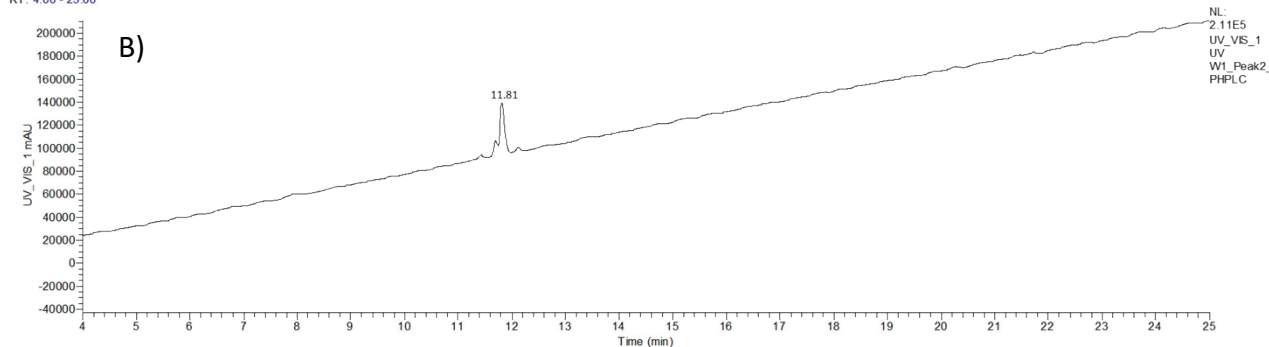

W1\_Peak2\_PHPLC#1847-1920 RT: 11.75-11.95 AV: 24 NL: 9.23E7  
T: FTMS + p ESI Full ms2 1100.0000@hcd35.00 [200.0000-2000.0000]

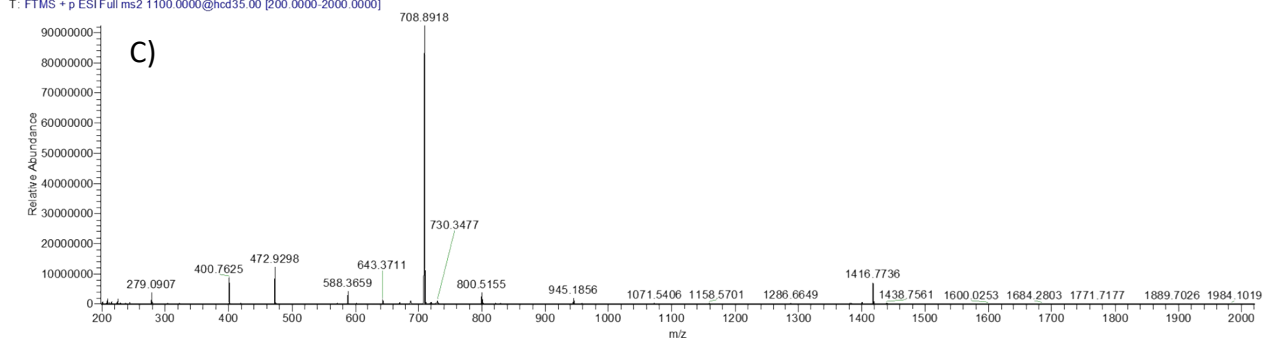

**Figure S3: A)** LM1 peptide chemical structure, **B)** LC-UV chromatogram of LM1 at 220nm;  $t_R = 11.81$  min; 76% purity, **C)** HRMS-ESI-MS<sup>2</sup> spectrum in the positive mode of LM1 peak

**Table S3: MS peaks and MS<sup>2</sup> fragments observed for LM1**

| Ion                                            | Found     | Expected  | $\Delta m$ |
|------------------------------------------------|-----------|-----------|------------|
| MNKLNEVELSKI-NH <sub>2</sub> + H <sup>+</sup>  | 1416.7736 | 1416.7879 | 10.1 ppm   |
| MNKLNEVELSKI-NH <sub>2</sub> + Na <sup>+</sup> | 1438.7561 | 1438.7699 | 9.6 ppm    |
| MNKLNEVELSKI-NH <sub>2</sub> + 2H <sup>+</sup> | 708.8918  | 708.8976  | 8.2 ppm    |
| LM1 I-NH <sub>2</sub>                          | 1286.6649 | 1286.6773 | 9.6 ppm    |
| LM1 KI-NH <sub>2</sub>                         | 1158.5701 | 1158.5824 | 10.6 ppm   |
| LM1 SKI-NH <sub>2</sub>                        | 1071.5406 | 1071.5503 | 9.1 ppm    |

A) LM2

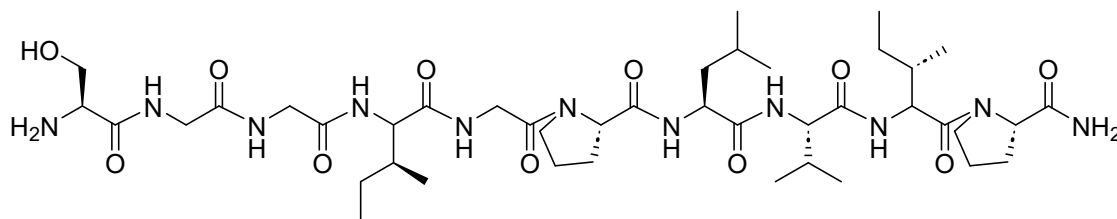

Chemical Formula: C<sub>42</sub>H<sub>73</sub>N<sub>11</sub>O<sub>11</sub>  
Exact Mass: 907.5491

C:\Xcalibur...W-2\_PHPLC\_freezedried

10/30/23 10:51:21

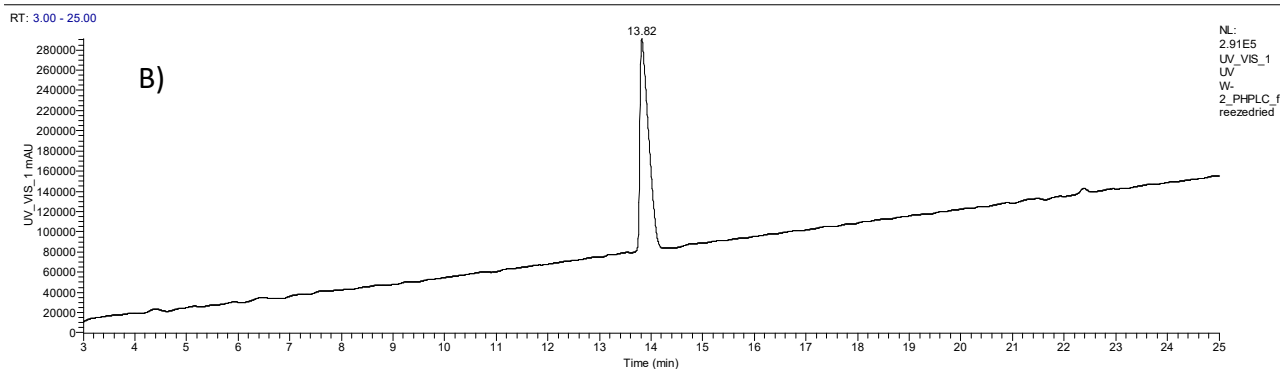

W-2\_PHPLC\_freezedried #3172-3313 RT: 13.69-14.04 AV: 41 NL: 1.61E9  
T: FTMS + p ESI Full ms [200.0000-2000.0000]

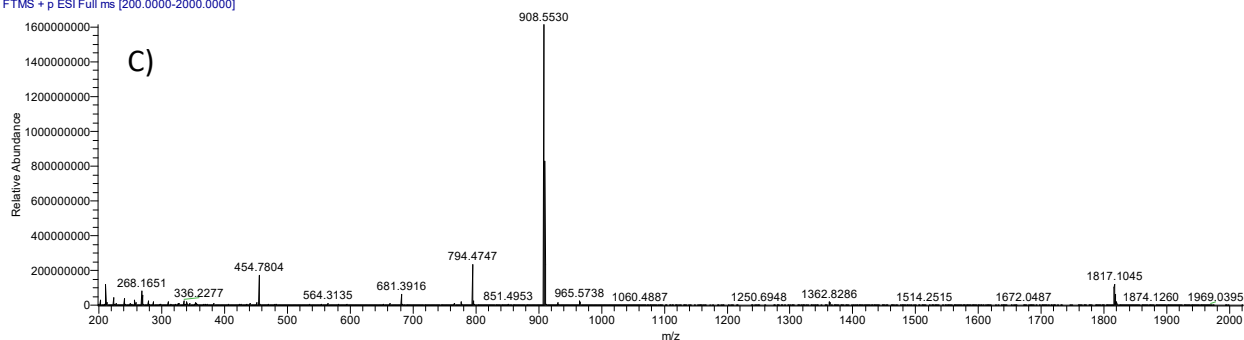

**Figure S4:** A) LM2 peptide chemical structure, B) LC-UV chromatogram of LM2 at 220nm;  $t_R = 13.82$  min; 99% purity, C) HRMS-ESI-MS<sup>2</sup> spectrum in the positive mode of LM2 peak.

**Table S4:** MS peaks and MS<sup>2</sup> fragments observed for LM2

| Ion                                                         | Found     | Expected  | $\Delta m$ |
|-------------------------------------------------------------|-----------|-----------|------------|
| SGGIGPLVIP-NH <sub>2</sub> + H <sup>+</sup>                 | 908.5530  | 908.5564  | 3.7 ppm    |
| (SGGIGPLVIP-NH <sub>2</sub> ) <sub>2</sub> + H <sup>+</sup> | 1816.1020 | 1816.1055 | 1.9 ppm    |
| SGGIGPLVIP-NH <sub>2</sub> + 2H <sup>+</sup>                | 454.7804  | 454.7819  | 3.3 ppm    |
| LM2 P-NH <sub>2</sub>                                       | 794.4747  | 794.4771  | 3.0 ppm    |
| LM2 IP-NH <sub>2</sub>                                      | 681.3916  | 681.3931  | 2.2 ppm    |
| LM2 VIP-NH <sub>2</sub> H <sub>2</sub> O                    | 564.3135  | 564.3141  | 1.1 ppm    |

### A) LM3

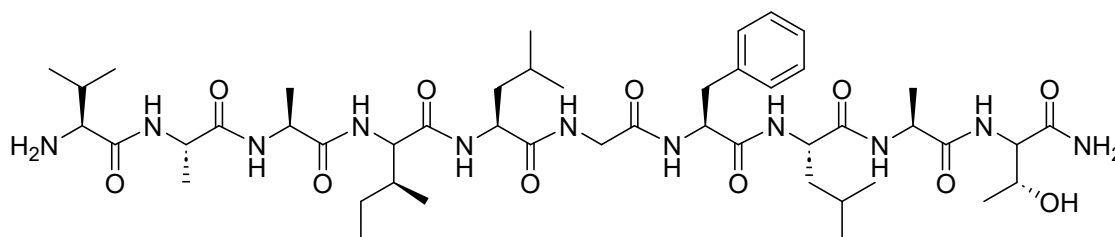

Chemical Formula: C<sub>47</sub>H<sub>79</sub>N<sub>11</sub>O<sub>11</sub>

Exact Mass: 973.5961

C:\Xcalibur\...03042024\W3-PHPLCNew

04/03/24 16:32:15

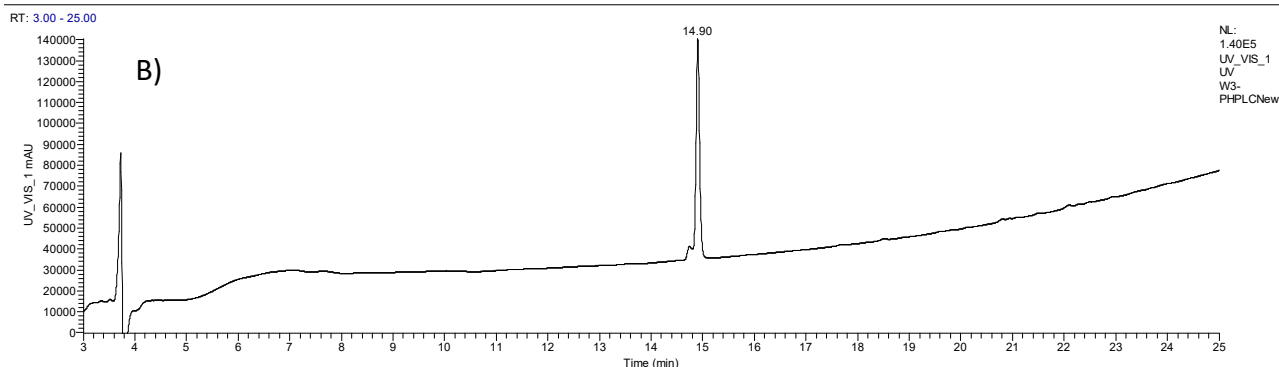

W3-PHPLCNew#2648-2715 RT: 14.82-14.99 AV: 20 NL: 9.02E7  
T: FTMS + p ESI Full ms2 1100.0000@hcd35.00 [200.0000-2000.0000]

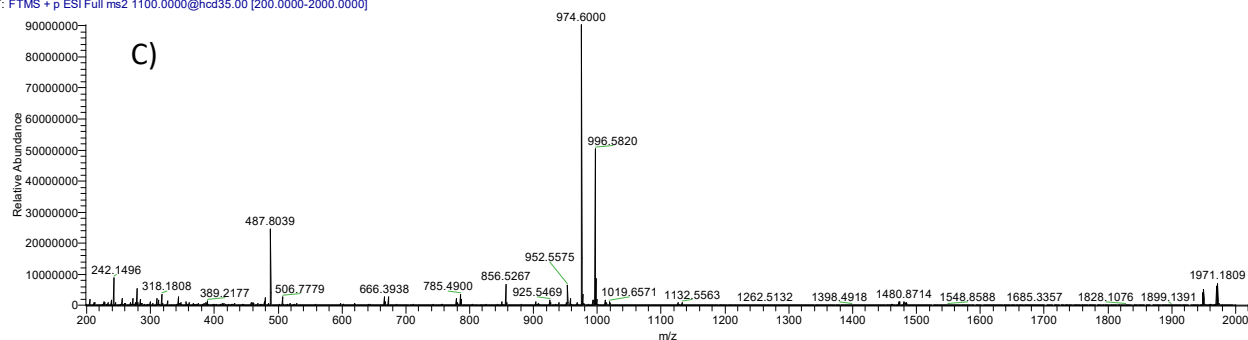

**Figure S5: A)** LM3 peptide chemical structure, **B)** LC-UV chromatogram of LM3 at 220nm;  $t_R = 14.90$  min; 96% purity, **C)** HRMS-ESI-MS<sup>2</sup> spectrum in the positive mode of LM3 peak.

**Table S5: MS peaks and MS<sup>2</sup> fragments observed for LM3**

| Ion                                                          | Found     | Expected  | $\Delta m$ |
|--------------------------------------------------------------|-----------|-----------|------------|
| VAAILGFLAT-NH <sub>2</sub> + H <sup>+</sup>                  | 974.6000  | 974.6033  | 3.4 ppm    |
| VAAILGFLAT-NH <sub>2</sub> + Na <sup>+</sup>                 | 996.5820  | 996.5853  | 3.3 ppm    |
| (VAAILGFLAT-NH <sub>2</sub> ) <sub>2</sub> + H <sup>+</sup>  | 1949.1989 | 1949.2028 | 2.0 ppm    |
| (VAAILGFLAT-NH <sub>2</sub> ) <sub>2</sub> + Na <sup>+</sup> | 1971.1816 | 1971.1847 | 1.6 ppm    |
| VAAILGFLAT-NH <sub>2</sub> + 2H <sup>+</sup>                 | 487.8039  | 487.8053  | 2.9 ppm    |
| LM3 T-NH <sub>2</sub>                                        | 856.5267  | 856.5291  | 2.8 ppm    |
| LM3 AT-NH <sub>2</sub>                                       | 785.4900  | 785.4920  | 2.5 ppm    |
| LM3 LAT-NH <sub>2</sub>                                      | 672.4063  | 672.4080  | 2.5 ppm    |

A) LM4

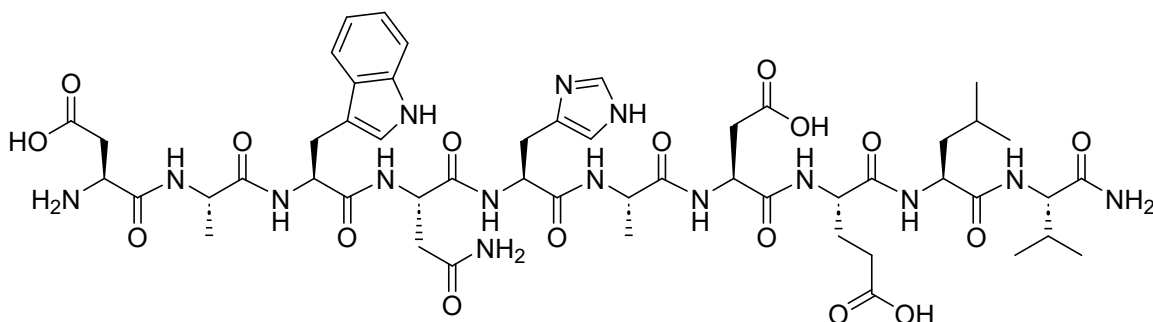

Chemical Formula: C<sub>51</sub>H<sub>73</sub>N<sub>15</sub>O<sub>17</sub>  
Exact Mass: 1167.5309

C:\Xcalibur\_LW4\_1405-1460\_PHPLC\_3

02/27/24 18:37:37

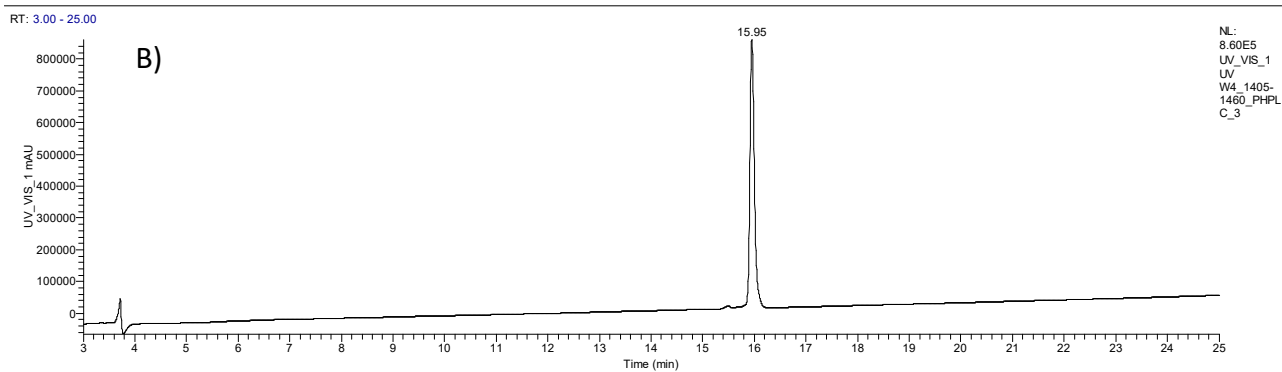

W4\_1405-1460\_PHPLC\_3 #3345-3415 RT: 15.87-16.06 AV: 23 NL: 4.10E7

T: FTMS + p ESI Full ms2 1100.0000@hcd35.00 [200.0000-2000.0000]

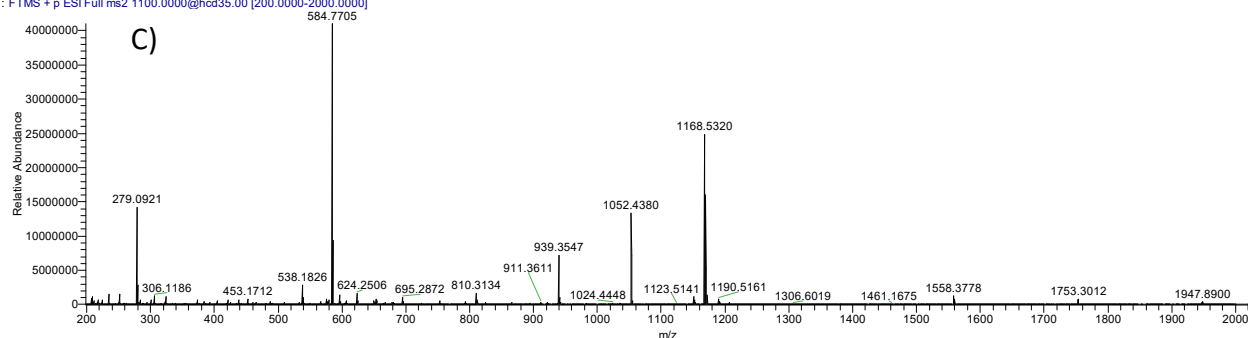

**Figure S6: A)** LM4 peptide chemical structure, **B)** LC-UV chromatogram of LM4 at 220nm;  $t_R = 15.95$  min; 97% purity, **C)** HRMS-ESI-MS<sup>2</sup> spectrum in the positive mode of LM4 peak.

**Table S6:** MS peaks and MS<sup>2</sup> fragments observed for LM4

| Ion                                          | Found     | Expected  | $\Delta m$ |
|----------------------------------------------|-----------|-----------|------------|
| DAWNHADELV-NH <sub>2</sub> + H <sup>+</sup>  | 1168.5320 | 1168.5382 | 5.3 ppm    |
| DAWNHADELV-NH <sub>2</sub> + Na <sup>+</sup> | 1190.5161 | 1190.5202 | 3.4 ppm    |
| DAWNHADELV-NH <sub>2</sub> + 2H <sup>+</sup> | 584.7705  | 584.7727  | 3.8 ppm    |
| LM4 V-NH <sub>2</sub>                        | 1052.4380 | 1052.4432 | 4.9 ppm    |
| LM4 LV-NH <sub>2</sub>                       | 939.3547  | 939.3592  | 4.8 ppm    |
| LM4 ELV-NH <sub>2</sub>                      | 810.3134  | 810.3166  | 3.9 ppm    |
| LM4 DELV-NH <sub>2</sub>                     | 695.2872  | 695.2896  | 3.5 ppm    |
| LM4 ADELV-NH <sub>2</sub>                    | 624.2506  | 624.2525  | 3.0 ppm    |





A) LM6

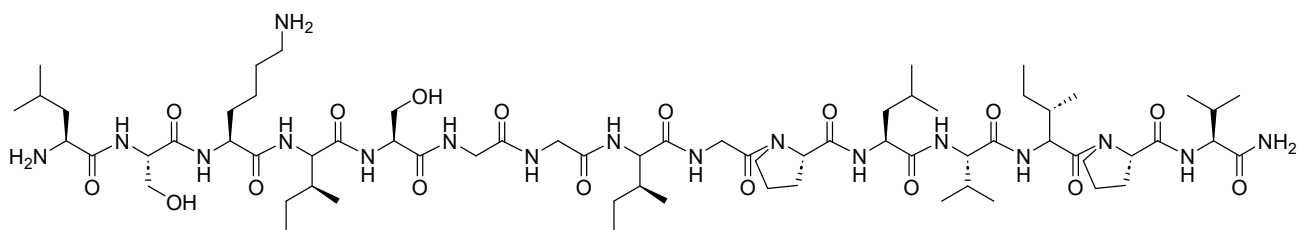

Chemical Formula: C<sub>68</sub>H<sub>120</sub>N<sub>16</sub>O<sub>18</sub>  
Exact Mass: 1448.8967

MD016\_Peak1\_PePLC\_20230925112046

09/25/23 11:22:03

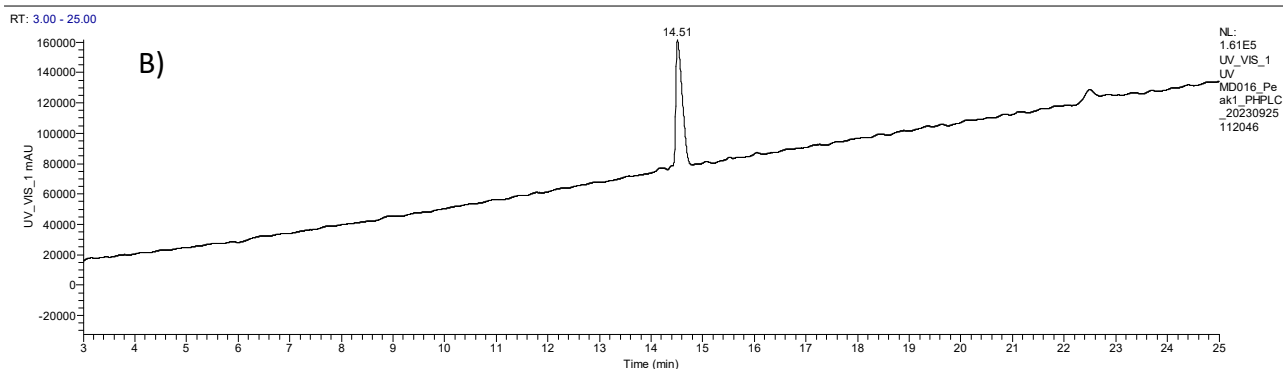

MD016\_Peak1\_PePLC\_20230925112046 #2998-3125 RT: 14.39-14.71 AV: 37 NL: 6.65E8  
T: FTMS + p ESI Full ms [200.0000-2000.0000]

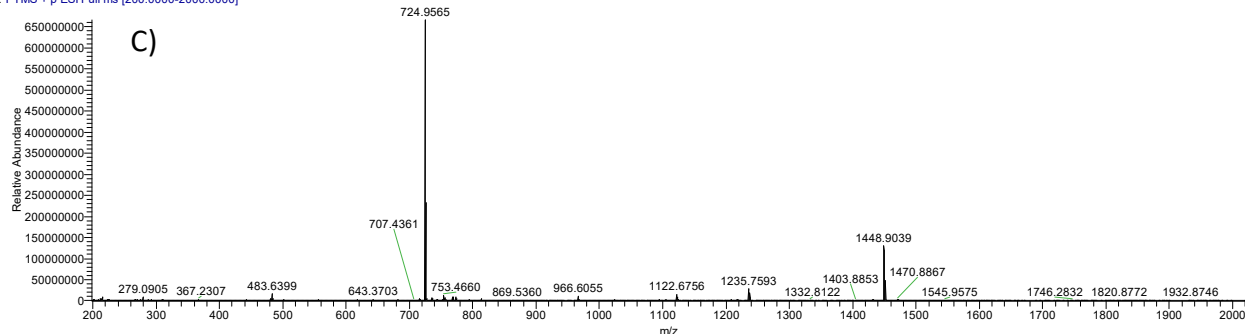

**Figure S8:** A) LM6 peptide chemical structure, B) LC-UV chromatogram of LM6 at 220nm;  $t_R = 14.51$  min; 98% purity, C) HRMS-ESI-MS<sup>2</sup> spectrum in the positive mode of LM6 peak.

**Table S8:** MS peaks and MS<sup>2</sup> fragments observed for LM6

| Ion                                               | Found     | Expected  | $\Delta m$ |
|---------------------------------------------------|-----------|-----------|------------|
| LSKISGGIGPLVIPV-NH <sub>2</sub> + H <sup>+</sup>  | 1448.9039 | 1448.9199 | 11.0 ppm   |
| LSKISGGIGPLVIPV-NH <sub>2</sub> + Na <sup>+</sup> | 1470.8867 | 1470.9019 | 10.3 ppm   |
| LSKISGGIGPLVIPV-NH <sub>2</sub> + 2H <sup>+</sup> | 724.9565  | 724.9636  | 9.8 ppm    |
| LM6 CO-NH <sub>2</sub>                            | 1403.8853 | 1403.8985 | 9.4 ppm    |
| LM6 V-NH <sub>2</sub>                             | 1332.8122 | 1332.8250 | 9.6 ppm    |
| LM6 PV-NH <sub>2</sub>                            | 1235.7593 | 1235.7722 | 10.4 ppm   |
| LM6 IPV-NH <sub>2</sub>                           | 1122.6756 | 1122.6882 | 11.2 ppm   |
| LM6 IGPLVIPV-NH <sub>2</sub>                      | 643.3703  | 643.3774  | 11.0 ppm   |

A) LM7

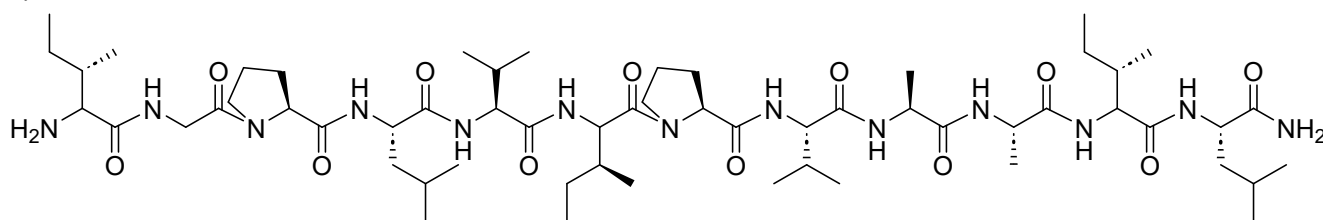

Chemical Formula: C<sub>58</sub>H<sub>103</sub>N<sub>13</sub>O<sub>12</sub>

Exact Mass: 1173.7849

C:\Xcalibur...MD014-PHPLC127-1325

02/09/24 09:21:38

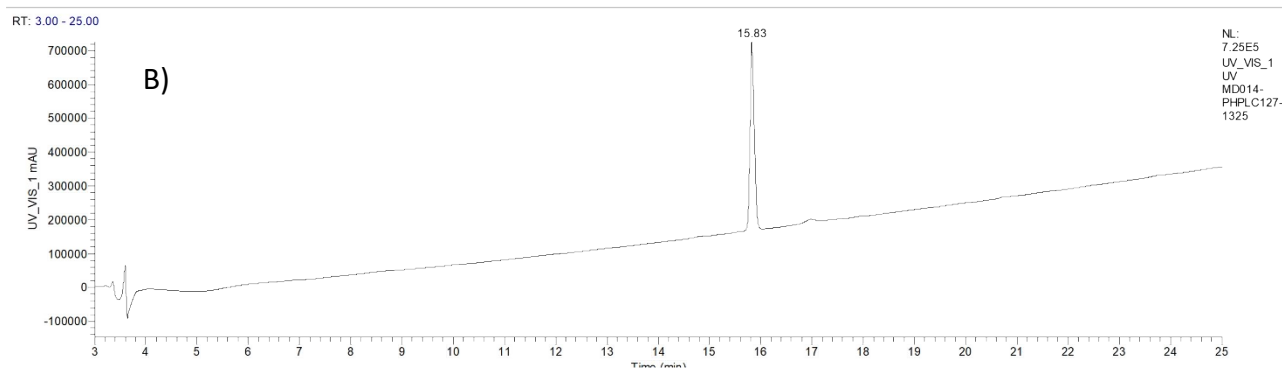

MD014-PHPLC127-1325 #2064-2154 RT: 15.71-15.93 AV: 13 NL: 5.54E8  
T: FTMS + p ESI Full ms [400.0000-4000.0000]

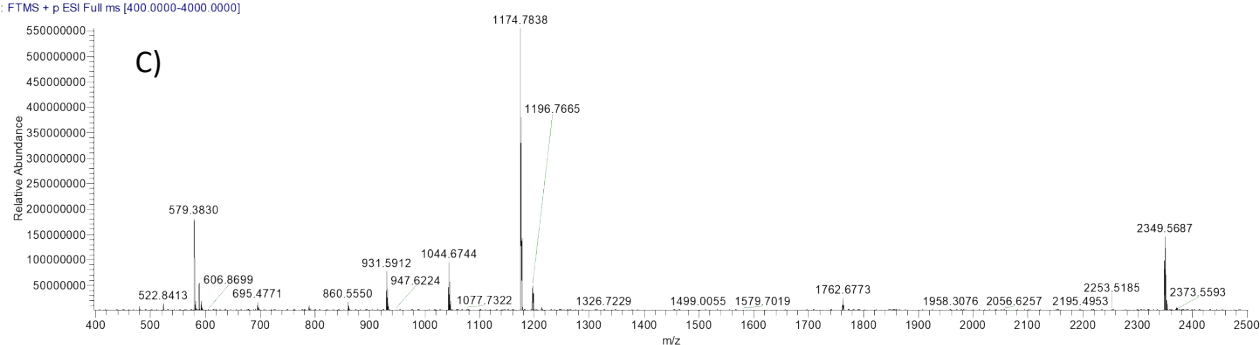

**Figure S9:** A) LM7 peptide chemical structure, B) LC-UV chromatogram of LM7 at 220nm;  $t_R = 15.83$  min; 97% purity, C) HRMS-ESI-MS<sup>2</sup> spectrum in the positive mode of LM7 peak.

**Table S9:** MS peaks and MS<sup>2</sup> fragments observed for LM7

| Ion                                                            | Found     | Expected  | $\Delta m$ |
|----------------------------------------------------------------|-----------|-----------|------------|
| IGPLVIPVAAIL-NH <sub>2</sub> + H <sup>+</sup>                  | 1174.7838 | 1174.7922 | 7.2 ppm    |
| IGPLVIPVAAIL-NH <sub>2</sub> + Na <sup>+</sup>                 | 1196.7665 | 1196.7742 | 6.4 ppm    |
| IGPLVIPVAAIL-NH <sub>2</sub> + K <sup>+</sup>                  | 1212.7397 | 1212.7481 | 6.9 ppm    |
| (IGPLVIPVAAIL-NH <sub>2</sub> ) <sub>3</sub> + 2H <sup>+</sup> | 1762.1749 | 1762.1864 | 6.5 ppm    |
| (IGPLVIPVAAIL-NH <sub>2</sub> ) <sub>2</sub> + H <sup>+</sup>  | 2349.5687 | 2349.5805 | 5.0 ppm    |
| IGPLVIPVAAIL-NH <sub>2</sub> + 2H <sup>+</sup>                 | 587.8960  | 587.8998  | 6.5 ppm    |
| LM7 L-NH <sub>2</sub>                                          | 1044.6744 | 1044.6816 | 6.9 ppm    |
| LM7 IL-NH <sub>2</sub>                                         | 931.5912  | 931.5976  | 6.9 ppm    |
| LM7 AIL-NH <sub>2</sub>                                        | 860.5550  | 860.5605  | 6.4 ppm    |
| LM7 AAAIL-NH <sub>2</sub>                                      | 789.5181  | 789.5233  | 6.6 ppm    |

**A) LM8**

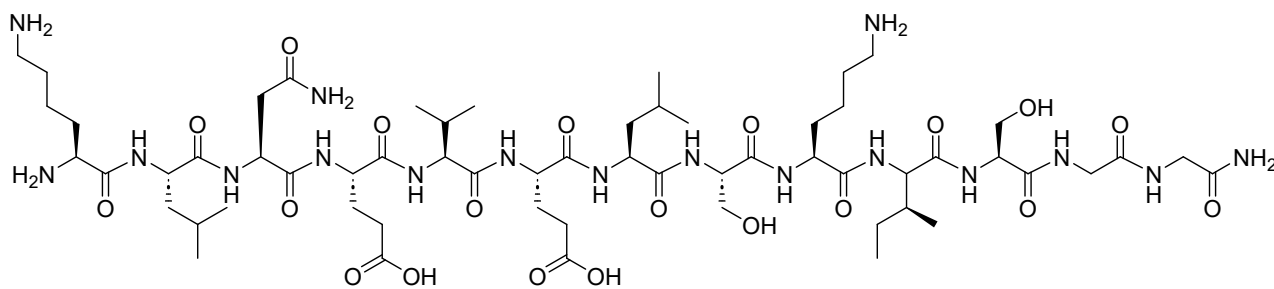

Chemical Formula:  $C_{59}H_{105}N_{17}O_{20}$   
Exact Mass: 1371.7722

C:\Xcalibur...MD017-1-19\_PHPLC\_Pure

01/17/24 19:04:01

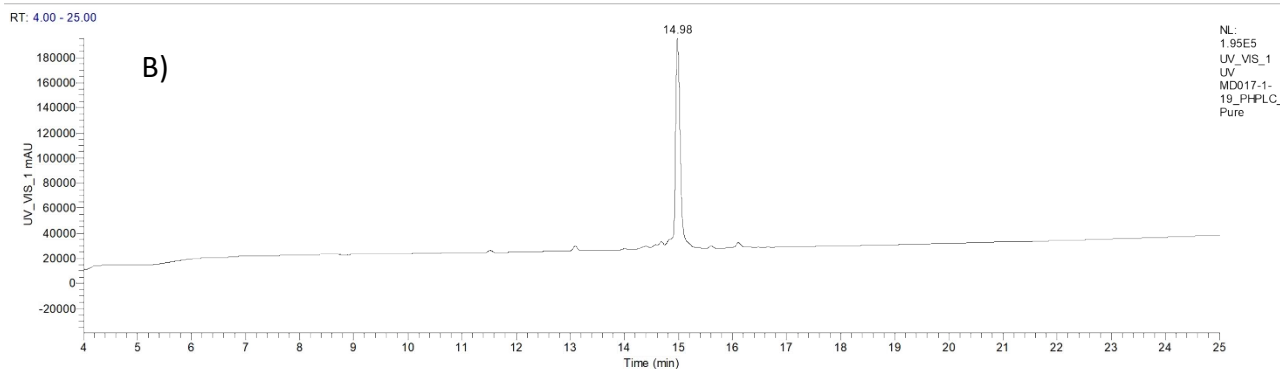

MD017-1-19\_PHPLC\_Pure #2005-2074 RT: 14.91-15.07 AV: 10 NL: 6.03E6  
F: FTMS + p ESI Full ms2 2200.0000@hcd35.00 [400.0000-4000.0000]

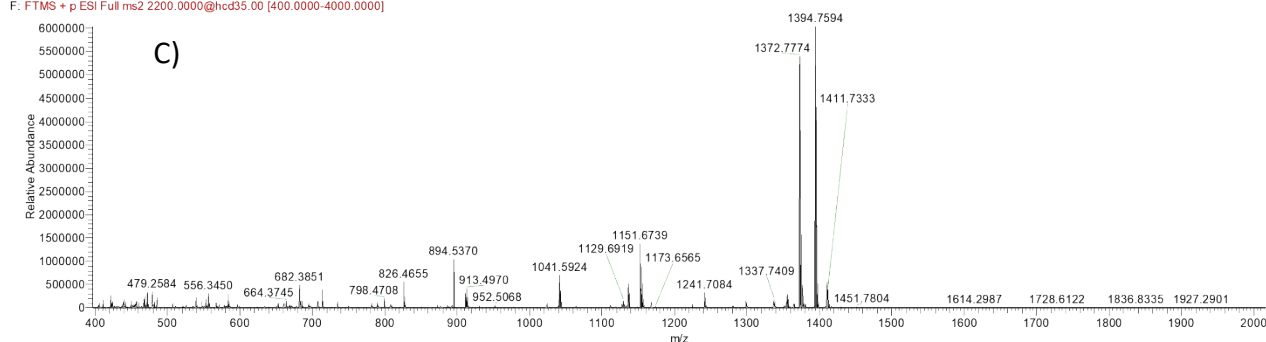

**Figure S10: A) LM8 peptide chemical structure, B) LC-UV chromatogram of LM8 at 220nm;  $t_R = 14.98$  min; 98% purity, C) HRMS-ESI-MS<sup>2</sup> spectrum in the positive mode of LM8 peak.**

**Table S10: MS peaks and MS<sup>2</sup> fragments observed for LM8**

| Ion                                             | Found     | Expected  | $\Delta m$ |
|-------------------------------------------------|-----------|-----------|------------|
| KLNEVELSKISGG-NH <sub>2</sub> + H <sup>+</sup>  | 1372.7774 | 1372.7795 | 1.5 ppm    |
| KLNEVELSKISGG-NH <sub>2</sub> + Na <sup>+</sup> | 1394.7594 | 1394.7614 | 1.4 ppm    |
| KLNEVELSKISGG-NH <sub>2</sub> + K <sup>+</sup>  | 1410.7302 | 1410.7354 | 3.7 ppm    |
| LM8 GG-NH <sub>2</sub>                          | 1241.7084 | 1241.7100 | 1.3 ppm    |
| LM8 ISGG-NH <sub>2</sub>                        | 1041.5924 | 1041.5939 | 1.4 ppm    |
| LM8 KISGG-NH <sub>2</sub>                       | 913.4970  | 913.4990  | 2.2 ppm    |
| LM8 SKISGG-NH <sub>2</sub>                      | 826.4655  | 826.4669  | 1.7 ppm    |

A) LM9

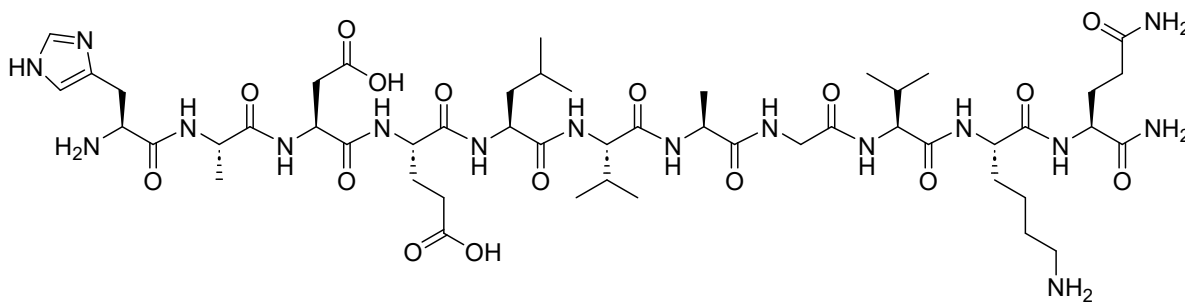

Chemical Formula: C<sub>50</sub>H<sub>84</sub>N<sub>16</sub>O<sub>16</sub>  
Exact Mass: 1164.6251

C:\Xcalibur...MD015(HQ11)\_PHPLC

11/13/23 13:29:42

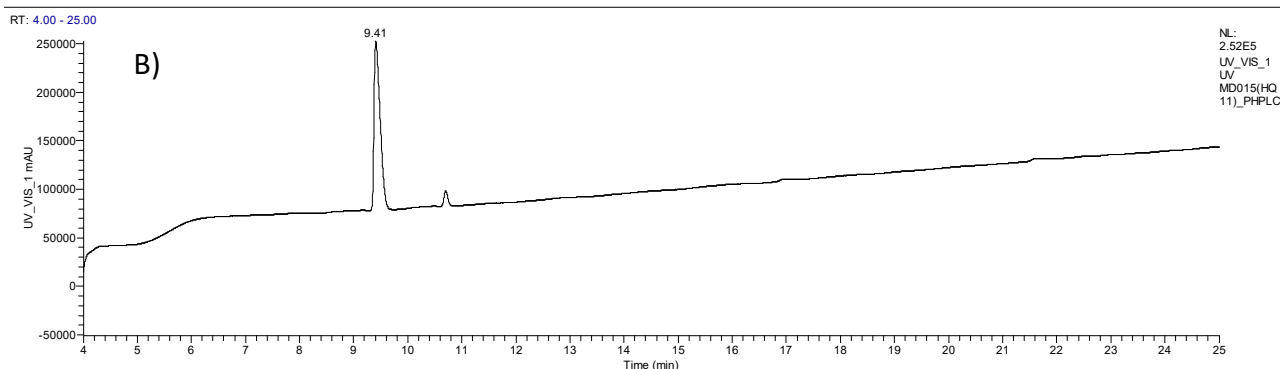

MD015(HQ11)\_PHPLC #1847-1930 RT: 9.34-9.54 AV: 24 NL: 7.16E8  
T: FTMS + p ESI Full ms2 1100.0000@hcd35.00 [200.0000-2000.0000]

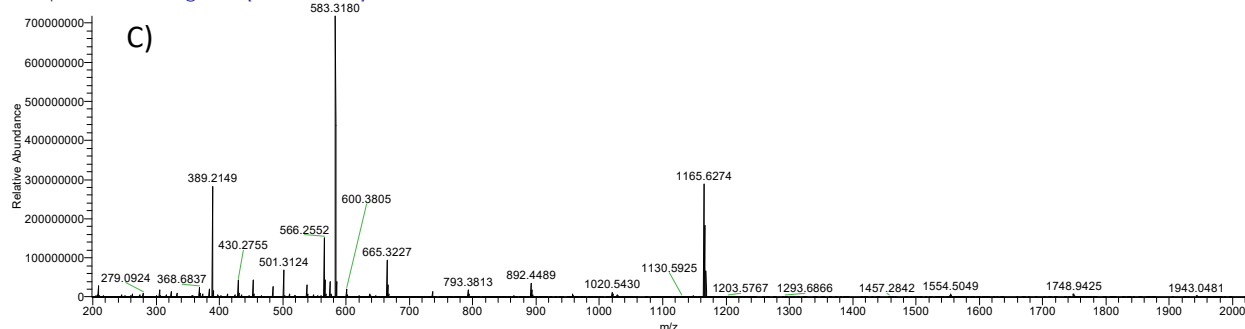

**Figure S11: A)** LM9 peptide chemical structure, **B)** LC-UV chromatogram of LM9 at 220nm;  $t_R = 9.41$  min; 95% purity, **C)** HRMS-ESI-MS<sup>2</sup> spectrum in the positive mode of LM9 peak.

**Table S11:** MS peaks and MS<sup>2</sup> fragments observed for LM9

| Ion                                           | Found     | Expected  | $\Delta m$ |
|-----------------------------------------------|-----------|-----------|------------|
| HADELVAGVKQ-NH <sub>2</sub> + H <sup>+</sup>  | 1165.6274 | 1165.6324 | 4.3 ppm    |
| HADELVAGVKQ-NH <sub>2</sub> + 2H <sup>+</sup> | 583.3180  | 583.3199  | 3.3 ppm    |
| LM9 Q-NH <sub>2</sub>                         | 1020.5430 | 1020.5473 | 4.2 ppm    |
| LM9 KQ-NH <sub>2</sub>                        | 892.4489  | 892.4524  | 3.9 ppm    |
| LM9 VKQ-NH <sub>2</sub>                       | 793.3813  | 793.3839  | 3.3 ppm    |
| LM9 GVKQ-NH <sub>2</sub>                      | 736.3600  | 736.3625  | 3.4 ppm    |
| LM9 AGVKQ-NH <sub>2</sub>                     | 665.3227  | 665.3254  | 4.1 ppm    |
| LM9 VAGVKQ-NH <sub>2</sub>                    | 566.2552  | 566.2570  | 3.2 ppm    |
| LM9 LVAGVKQ-NH <sub>2</sub>                   | 453.1715  | 453.1729  | 3.1 ppm    |
| LM9 HADELV + H <sup>+</sup>                   | 600.3805  | 600.3828  | 3.8 ppm    |
| LM9 HADELV + H <sup>+</sup>                   | 501.3124  | 501.3144  | 4.0 ppm    |
| LM9 HADELVA + H <sup>+</sup>                  | 430.2755  | 430.2773  | 4.2 ppm    |

### A) LM10

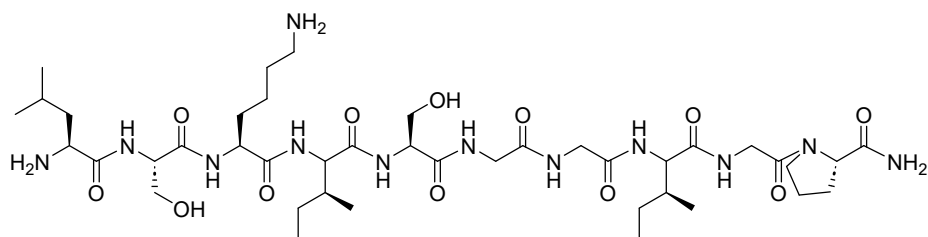

Chemical Formula: C<sub>41</sub>H<sub>74</sub>N<sub>12</sub>O<sub>12</sub>  
Exact Mass: 926.5549

MD016\_T1\_PHPLC\_1\_20240228134811

02/28/24 13:49:22

RT: 3.00 - 25.00

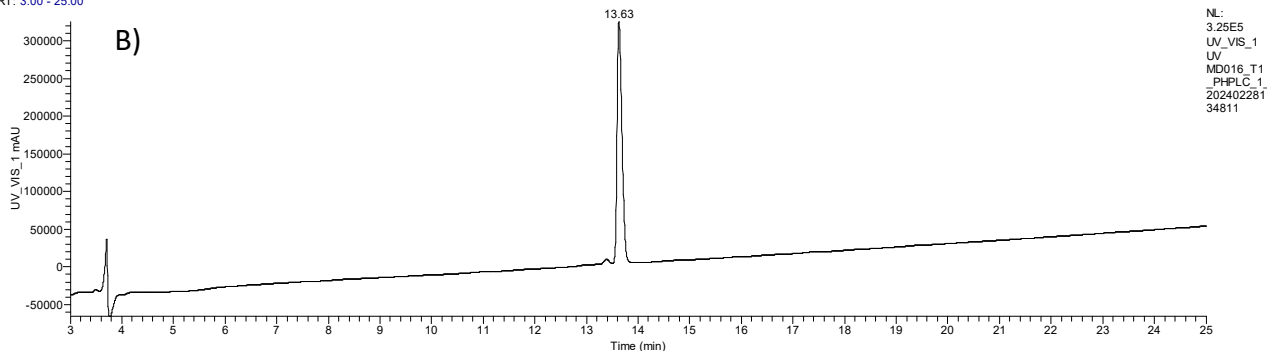

MD016\_T1\_PHPLC\_1\_20240228134811 #2601-2702 RT: 13.53-13.80 AV: 32 NL: 1.61E8  
T: FTMS + p ESI Full ms2 1100.0000@hcd35.00 [200.0000-2000.0000]

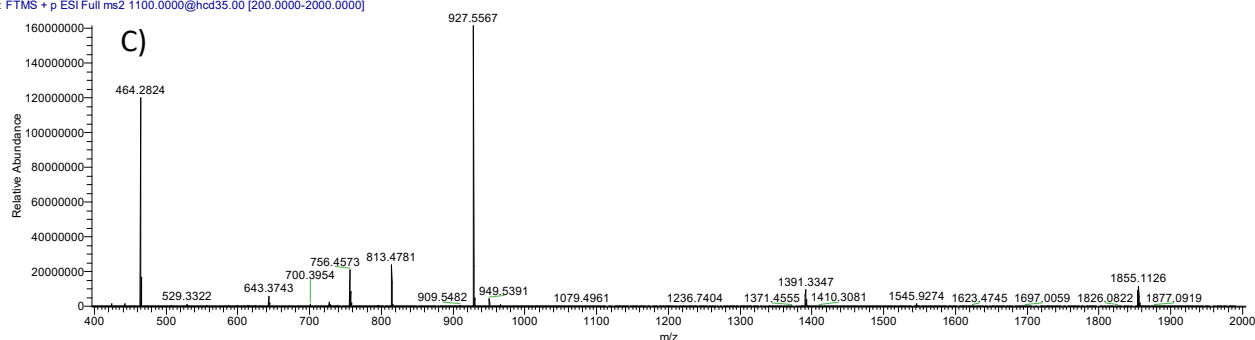

**Figure S12:** A) LM10 peptide chemical structure, B) LC-UV chromatogram of LM10 at 220nm;  $t_R = 13.63$  min; 96% purity, C) HRMS-ESI-MS<sup>2</sup> spectrum in the positive mode of LM10 peak.

**Table S12:** MS peaks and MS<sup>2</sup> fragments observed for LM10

| Ion                                                          | Found     | Expected  | $\Delta m$ |
|--------------------------------------------------------------|-----------|-----------|------------|
| LSKISGGIGP-NH <sub>2</sub> + H <sup>+</sup>                  | 927.5567  | 927.5622  | 5.9 ppm    |
| LSKISGGIGP-NH <sub>2</sub> + Na <sup>+</sup>                 | 949.5391  | 949.5442  | 5.4 ppm    |
| (LSKISGGIGP-NH <sub>2</sub> ) <sub>3</sub> + 2H <sup>+</sup> | 1391.3347 | 1391.3414 | 4.8 ppm    |
| (LSKISGGIGP-NH <sub>2</sub> ) <sub>2</sub> + H <sup>+</sup>  | 1854.1102 | 1854.1172 | 3.8 ppm    |
| LSKISGGIGP-NH <sub>2</sub> + 2H <sup>+</sup>                 | 464.2824  | 464.2848  | 5.2 ppm    |
| LM10 P-NH <sub>2</sub>                                       | 813.4781  | 813.4829  | 5.9 ppm    |
| LM10 GP-NH <sub>2</sub>                                      | 756.4573  | 756.4615  | 5.6 ppm    |
| LM10 IGP-NH <sub>2</sub>                                     | 643.3743  | 643.3774  | 4.8 ppm    |
| LM10 GGIGP-NH <sub>2</sub>                                   | 529.3322  | 529.3345  | 4.3 ppm    |

### A) LM11

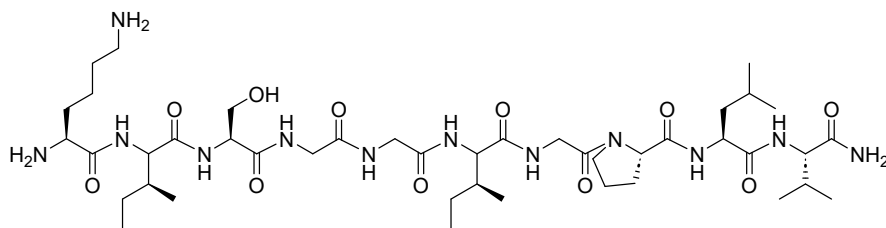

Chemical Formula: C<sub>43</sub>H<sub>78</sub>N<sub>12</sub>O<sub>11</sub>  
Exact Mass: 938.5913

MD016\_T3\_PHPLC\_2\_20240228153701

02/28/24 15:38:11

RT: 3.00 - 25.00

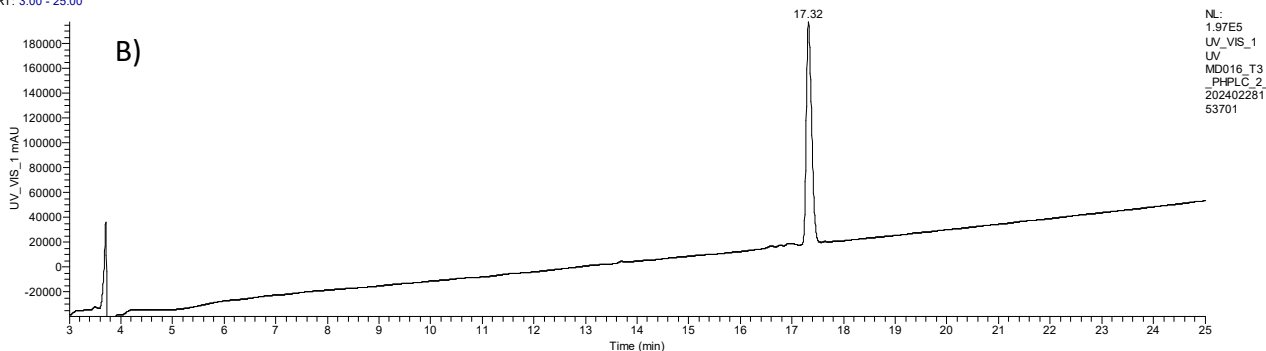

MD016\_T3\_PHPLC\_2\_20240228153701 #3338-3413 RT: 17.26-17.44 AV: 22 NL: 1.75E8  
T: FTMS + p ESI Full ms2 1100.0000@hcd35.00 [200.0000-2000.0000]

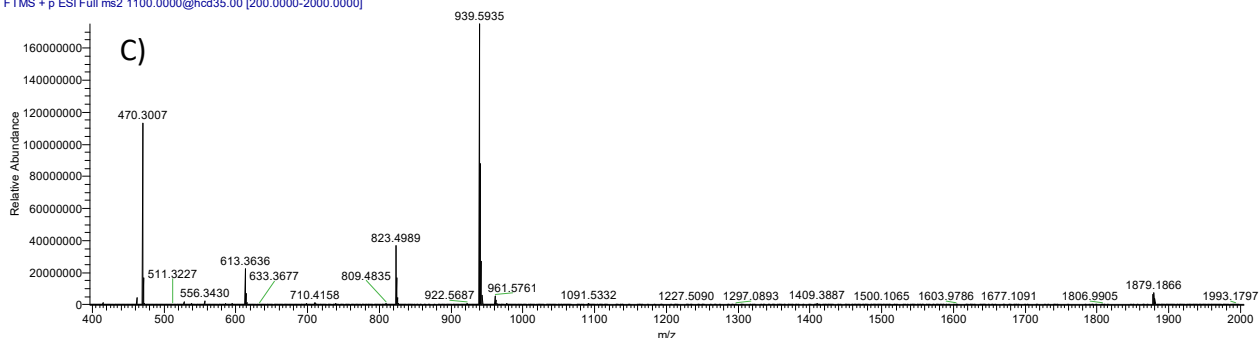

**Figure S13:** A) LM11 peptide chemical structure, B) LC-UV chromatogram of LM11 at 220nm;  $t_R = 17.32$  min; 97% purity, C) HRMS-ESI-MS<sup>2</sup> spectrum in the positive mode of LM11 peak.

**Table S13:** MS peaks and MS<sup>2</sup> fragments observed for LM11

| Ion                                                         | Found     | Expected  | $\Delta m$ |
|-------------------------------------------------------------|-----------|-----------|------------|
| KISGGIGPLV-NH <sub>2</sub> + H <sup>+</sup>                 | 939.5935  | 939.5986  | 5.4 ppm    |
| KISGGIGPLV-NH <sub>2</sub> + Na <sup>+</sup>                | 961.5761  | 961.5806  | 4.7 ppm    |
| (KISGGIGPLV-NH <sub>2</sub> ) <sub>2</sub> + H <sup>+</sup> | 1878.1840 | 1878.1899 | 3.1 ppm    |
| KISGGIGPLV-NH <sub>2</sub> + 2H <sup>+</sup>                | 470.3007  | 470.3030  | 4.9 ppm    |
| LM11 V-NH <sub>2</sub>                                      | 823.5037  | 823.4989  | 5.8 ppm    |
| LM11 LV-NH <sub>2</sub>                                     | 710.4158  | 710.4196  | 5.3 ppm    |
| LM11 PLV-NH <sub>2</sub>                                    | 613.3636  | 613.3668  | 5.2 ppm    |
| LM11 GPLV-NH <sub>2</sub>                                   | 556.3430  | 556.3454  | 4.3 ppm    |

### A) LM12

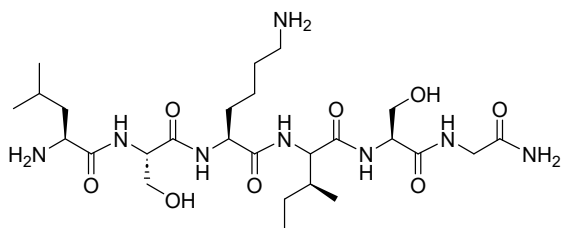

Chemical Formula: C<sub>26</sub>H<sub>50</sub>N<sub>8</sub>O<sub>8</sub>  
Exact Mass: 602.3752

C:\Xcalibur\...24012024\MD016\_T2\_TC

01/24/24 16:21:09

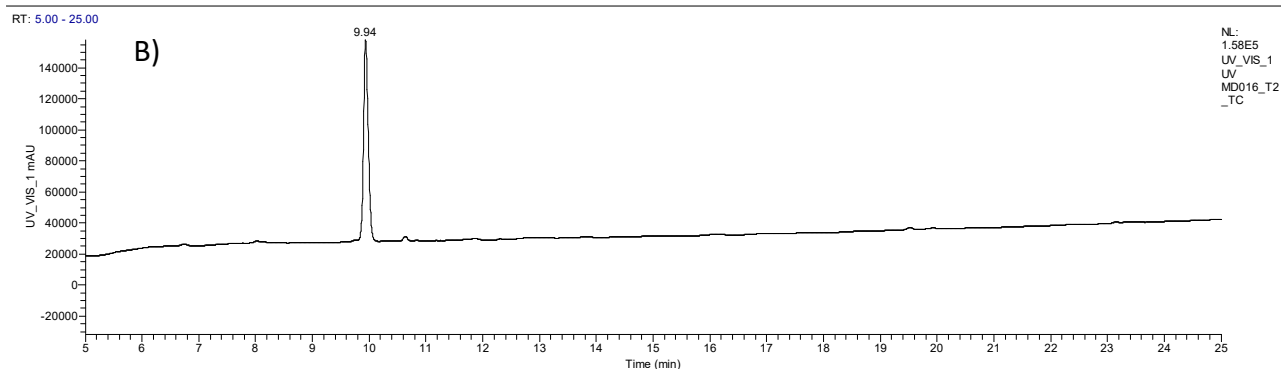

MD016\_T2\_TC#1273-1343 RT: 9.84-10.05 AV: 25 NL: 9.82E7  
T: FTMS + p ESI Full

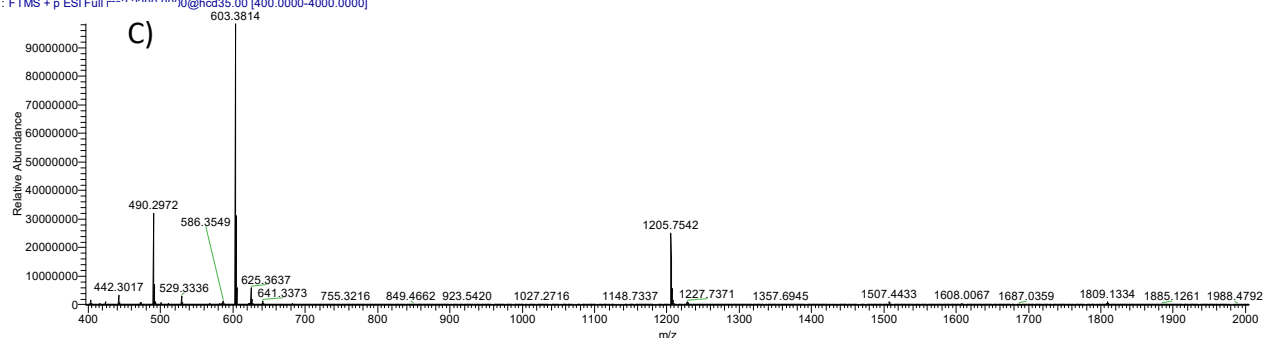

**Figure S14:** A) LM12 peptide chemical structure, B) LC-UV chromatogram of LM12 at 220nm;  $t_R = 9.94$  min; 95% purity, C) HRMS-ESI-MS<sup>2</sup> spectrum in the positive mode of LM12 peak.

**Table S14:** MS peaks and MS<sup>2</sup> fragments observed for LM12

| Ion                                                     | Found     | Expected  | $\Delta m$ |
|---------------------------------------------------------|-----------|-----------|------------|
| LSKISG-NH <sub>2</sub> + H <sup>+</sup>                 | 603.3814  | 603.3824  | 1.7 ppm    |
| LSKISG-NH <sub>2</sub> + Na <sup>+</sup>                | 625.3637  | 625.3644  | 1.1 ppm    |
| LSKISG-NH <sub>2</sub> + K <sup>+</sup>                 | 641.3373  | 641.3384  | 1.7 ppm    |
| (LSKISG-NH <sub>2</sub> ) <sub>2</sub> + H <sup>+</sup> | 1205.7542 | 1205.7576 | 2.8 ppm    |
| LM12 NH <sub>2</sub>                                    | 586.3549  | 586.3559  | 1.7 ppm    |
| LM12 G-NH <sub>2</sub>                                  | 529.3336  | 529.3345  | 1.7 ppm    |
| LM12 SG-NH <sub>2</sub>                                 | 442.3017  | 442.3024  | 1.6 ppm    |
| LM12 L + H <sup>+</sup>                                 | 490.2972  | 490.2984  | 2.4 ppm    |



### A) LM13a

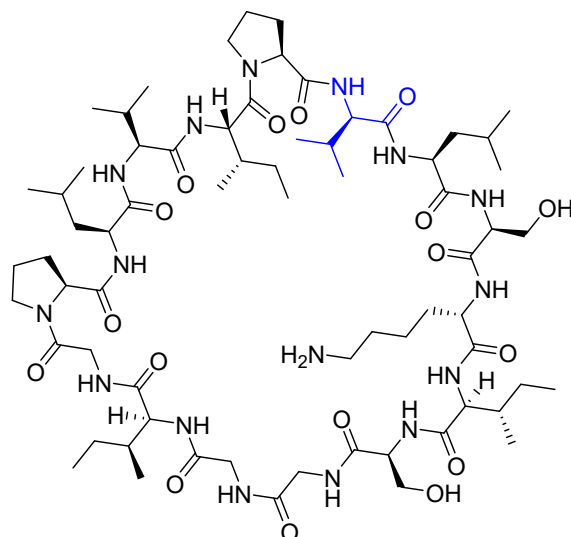

Chemical Formula:  $C_{68}H_{118}N_{16}O_{17}$   
Exact Mass: 1430.88609

C:\Xcalibur...MD016\_CyclicPurePk2\_B

01/18/24 10:49:35

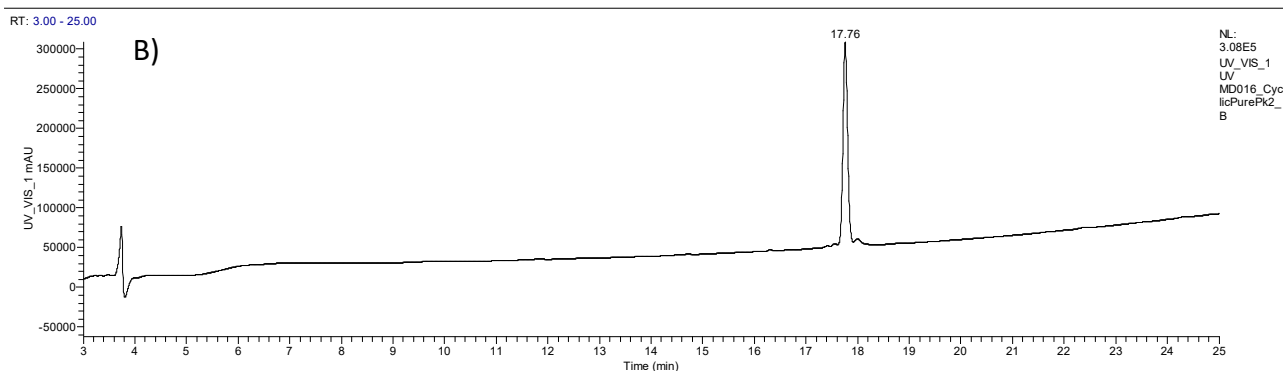

MD016\_CyclicPurePk2\_B #2296-2364 RT: 17.68-17.84 AV: 19 NL: 2.12E8  
T: FTMS + p ESI Full r -6000.0000]

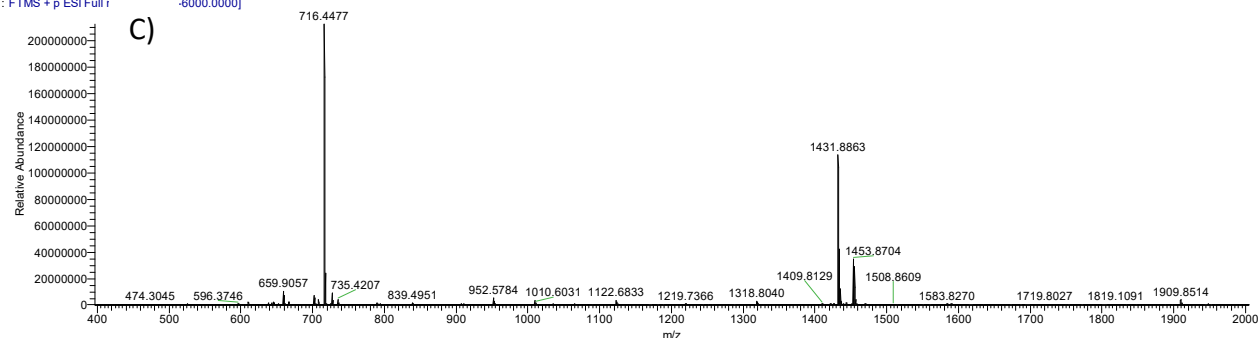

**Figure S15:** A) LM13a peptide chemical structure, B) LC-UV chromatogram of LM13a at 220nm;  $t_R = 17.76$  min; 95% purity, C) HRMS-ESI- $MS^2$  spectrum in the positive mode of LM13a peak.

**Table S15:** MS peaks observed for LM13a

| Ion                           | Found     | Expected  | $\Delta m$ |
|-------------------------------|-----------|-----------|------------|
| Cyc(LSKISGGIGPLVIPv) + $H^+$  | 1431.8863 | 1431.8934 | 5.0 ppm    |
| Cyc(LSKISGGIGPLVIPv) + $Na^+$ | 1453.8704 | 1453.8753 | 3.4 ppm    |
| Cyc(LSKISGGIGPLVIPv) + $2H^+$ | 716.4477  | 716.4503  | 3.6 ppm    |

A) LM13b

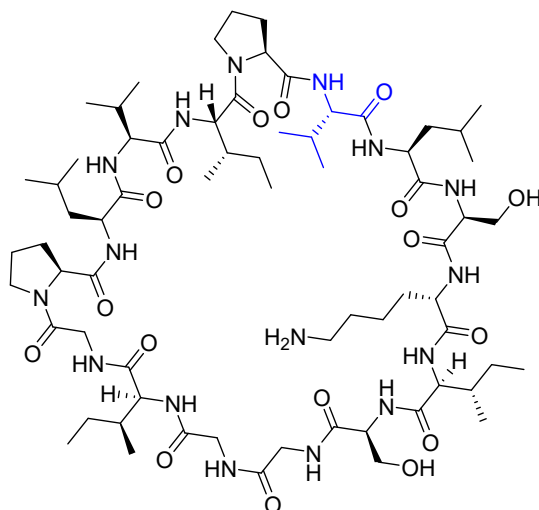

Chemical Formula: C<sub>68</sub>H<sub>118</sub>N<sub>16</sub>O<sub>17</sub>  
Exact Mass: 1430.88609

C:\Xcalibur\...MD016\_CyclicPurePk3\_ACN

01/18/24 11:25:56

RT: 3.00 - 25.00

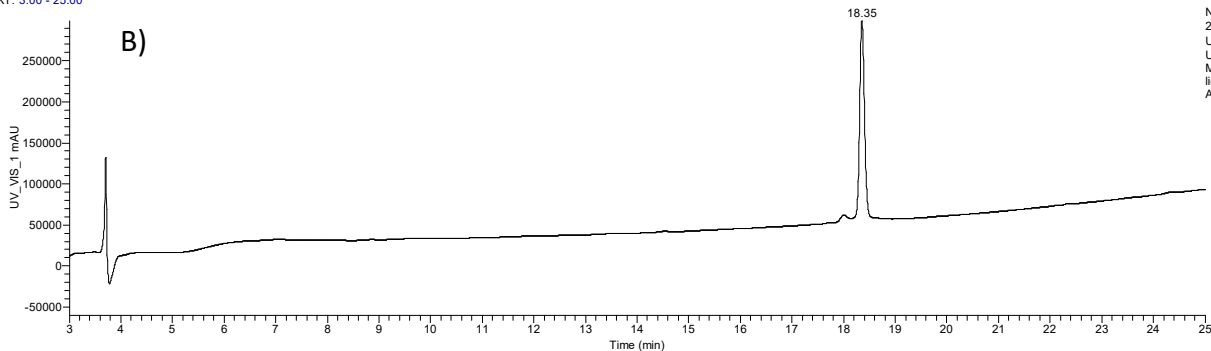

MD016\_CyclicPurePk3\_ACN#2342-2417 RT: 18.28-18.46 AV: 22 NL: 1.72E8  
T: FTMS + p ESI Full ms2 3200.0000@hcd35.00 [400.0000-8000.0000]

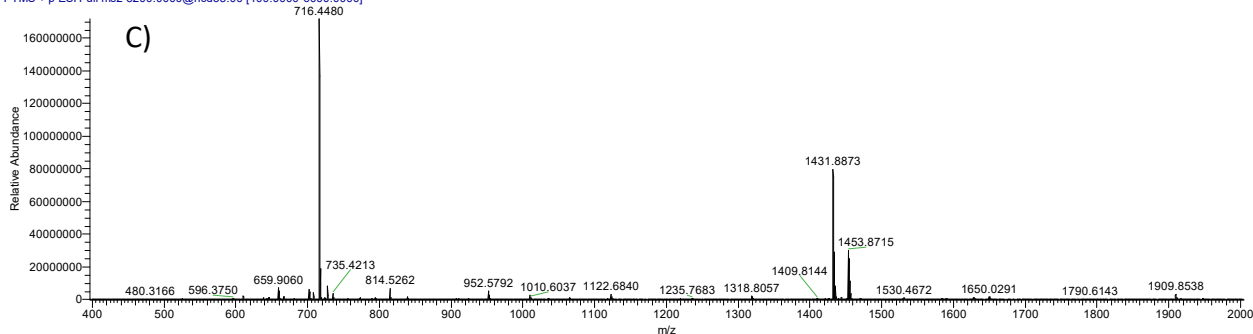

**Figure S16:** A) LM13b peptide chemical structure, B) LC-UV chromatogram of LM13b at 220nm;  $t_r$  = 18.35 min; 95% purity, C) HRMS-ESI-MS<sup>2</sup> spectrum in the positive mode of LM13b peak.

**Table S16:** MS peaks observed for LM13a

| Ion                                    | Found     | Expected  | $\Delta m$ |
|----------------------------------------|-----------|-----------|------------|
| Cyc(LSKISGGIGPLVIPV) + H <sup>+</sup>  | 1431.8873 | 1431.8934 | 4.3 ppm    |
| Cyc(LSKISGGIGPLVIPV) + Na <sup>+</sup> | 1453.8715 | 1453.8753 | 2.6 ppm    |
| Cyc(LSKISGGIGPLVIPV) + 2H <sup>+</sup> | 716.4480  | 716.4503  | 3.2 ppm    |

## MS/MS fragmentation data of LM6 and its cyclic derivatives LM13a and LM13b

### LM6

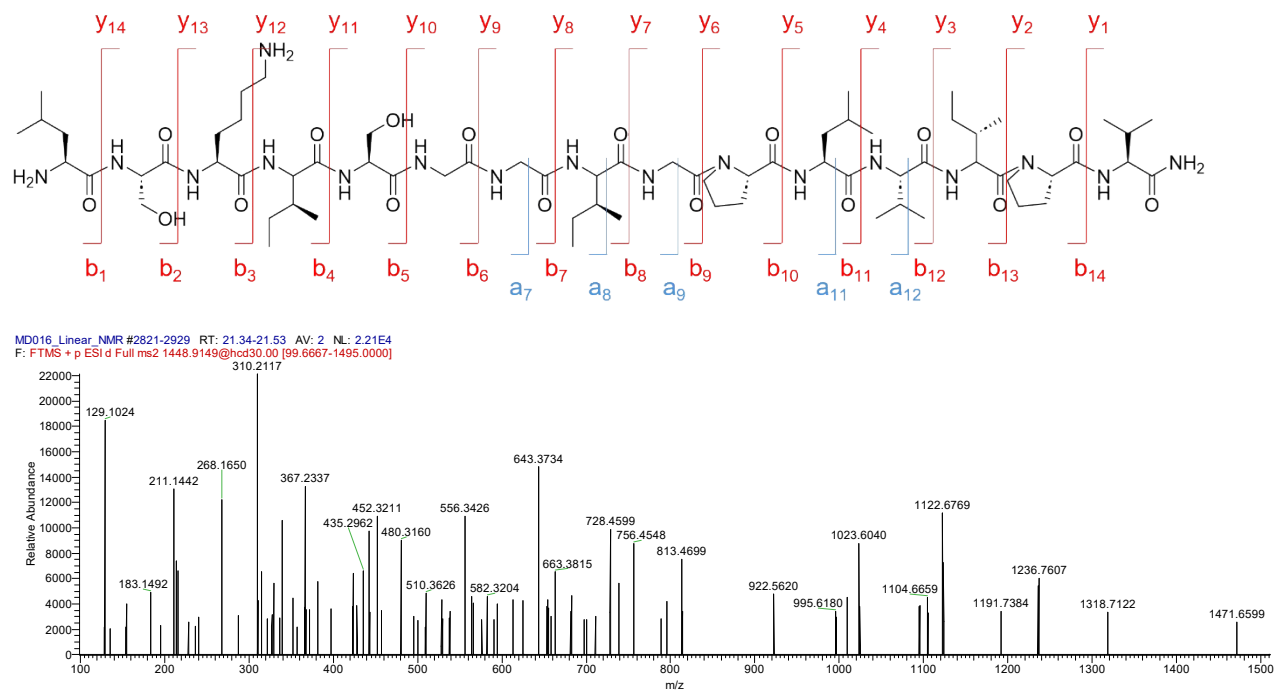

**Figure S17:** MS<sup>2</sup> fragmentation pattern and MS<sup>2</sup> spectrum of linear peptide LM6.

**Table S17:** MS<sup>2</sup> fragments observed for LM6 (LSKISGGIGPLVIPV)

| Ion | Observed m/z | Ion | Observed m/z |
|-----|--------------|-----|--------------|
| b13 | 1235.7515    | a8  | 728.4599     |
| b12 | 1122.6769    | b7  | 643.3734     |
| b11 | 1023.6040    | b5  | 529.3349     |
| a11 | 995.6180     | b4  | 442.3050     |
| b9  | 813.4699     | y3  | 327.2381     |
| a9  | 785.4830     | y2  | 214.1551     |
| b8  | 756.4548     | y1  | 117.1025     |

## LM13a

MD016\_CyclicPurePk2\_B #2399 RT: 17.86 AV: 1 NL: 6.37E5  
 F: FTMS + p ESI d Full ms2 1431.8934@hcd30.00 [196.3333-2945.0000]

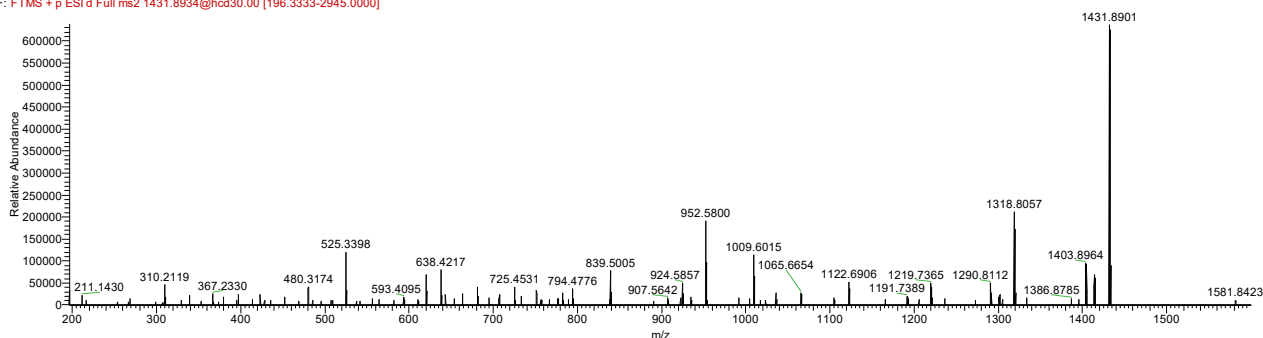

**Figure S18:** MS<sup>2</sup> fragmentation pattern of cyclic peptide LM13a.

| Ion                      | Additional | Observed m/z | Ion                   | Observed m/z |
|--------------------------|------------|--------------|-----------------------|--------------|
| LM13a                    | -CO        | 1403.8964    | LM13a -IVLPGI         | 839.5005     |
| LM13a -I / -L            |            | 1318.8057    | LM13a -KSLVPI         | 794.4776     |
| LM13a -I / -L            | -CO        | 1290.8112    | LM13a -IVLPGIGG       | 725.4554     |
| LM13a -VL / -IV / -LV    |            | 1219.7365    | LM13a -IVLPGIGGS      | 638.4217     |
| LM13a -VL -IV / -LV      | -CO        | 1191.7389    | LM13a -GGSIKSLVP      | 593.4095     |
| LM13a -VLP / -PIV / -LVP |            | 1122.6906    | LM13a -IVLPGIGGSI     | 525.3398     |
| LM13a -VLPG              |            | 1065.6654    | LM13a -IGGSIKSLVP     | 480.3174     |
| LM13a -LVPI / -IVLP      |            | 1009.6015    | LM13a -IGGSIKSLVPI    | 367.2330     |
| LM13a -IVLPG / -VLPGI    |            | 952.5800     | PVL / PLV / LVI / VIP | 310.2119     |
| LM13a -IVLPG / -VLPGI    | -CO        | 924.5857     | IP / PL               | 211.1430     |
| LM13a -KSLVP             |            | 907.5642     |                       |              |

## LM13b

MD016\_CyclicPurePK3\_ACN#2448 RT: 18.55 AV: 1 NL: 8.15E4  
 F: FTMS + p ESI d Full ms2 1431.8922@hcd30.00 [98.6667-1480.0000]

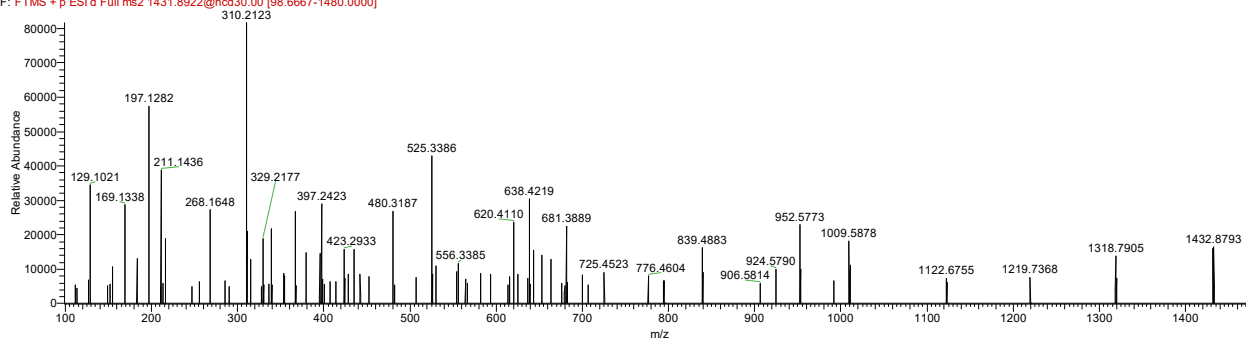

**Figure S19:** MS<sup>2</sup> fragmentation pattern of cyclic peptide LM13b.

| Ion                      | Additional        | Observed m/z | Ion                   | Additional        | Observed m/z |
|--------------------------|-------------------|--------------|-----------------------|-------------------|--------------|
| LM13a -I / -L            |                   | 1318.7905    | LM13a -IVLPGIGGS      | -H <sub>2</sub> O | 620.4110     |
| LM13a -VL / -IV / -LV    |                   | 1219.7368    | LM13a -IVLPGIGGSI     |                   | 525.3386     |
| LM13a -VLP / -PIV / -LVP |                   | 1122.6755    | LM13a -IGGSIKSLVP     |                   | 480.3187     |
| LM13a -LVPI / -IVLP      |                   | 1009.5878    | IPVL / LVIP / PLVI    |                   | 423.2933     |
| LM13a -IVLPG / -VLPGI    |                   | 952.5773     | PVLS                  |                   | 397.2423     |
| LM13a -IVLPG / -VLPGI    | -CO               | 924.5790     | LSK / SKI / KIS       |                   | 329.2177     |
| LM13a -IVLPGI            |                   | 839.4883     | PVL / PLV / LVI / VIP |                   | 310.2123     |
| LM13a -IKSLVP            | -H <sub>2</sub> O | 776.4604     | GPL / IGP             |                   | 268.1648     |
| LM13a -IVLPGIGG          |                   | 725.4523     | IP / PL               |                   | 211.1430     |
| LM13a -IKSLVPI           |                   | 681.3889     | PV                    |                   | 197.1282     |
| LM13a -IVLPGIGGS         |                   | 638.4219     | PV                    | -CO               | 169.1338     |
|                          |                   |              | K                     |                   | 129.1021     |
